# Supplementary material
Source: PubMed Central journal article supplement (PMC5503144)
Supplement: NIHMS874295-supplement-Supplemental_Tables_and_Notes.pdf [file NIHMS874295-supplement-Supplemental_Tables_and_Notes.pdf]

Supplementary Tables for “Phased Diploid Genome Assembly with Single Molecule Real-Time Sequencing”

Supplementary Table 1: Raw sequence data read length statistics

Col-0 Dataset, General Statistics

Statistics for all wells of length 500 bases or more

2,309,888 reads out of 2,348,820 ( 98.3%)

15,218,029,983 base pairs out of 15,226,098,559 ( 99.9%)

6,588 average read length

4,478 standard deviation

| Col-0: Distribution of Read Lengths (Bin size = 1,000) |        |         |         |         |
|--------------------------------------------------------|--------|---------|---------|---------|
| Bin:                                                   | Count  | % Reads | % Bases | Average |
| 41,000:                                                | 1      | 0.0     | 0.0     | 41981   |
| 40,000:                                                | 2      | 0.0     | 0.0     | 40886   |
| 39,000:                                                | 2      | 0.0     | 0.0     | 40345   |
| 38,000:                                                | 1      | 0.0     | 0.0     | 40029   |
| 37,000:                                                | 3      | 0.0     | 0.0     | 39084   |
| 36,000:                                                | 10     | 0.0     | 0.0     | 37707   |
| 35,000:                                                | 13     | 0.0     | 0.0     | 36771   |
| 34,000:                                                | 33     | 0.0     | 0.0     | 35602   |
| 33,000:                                                | 34     | 0.0     | 0.0     | 34864   |
| 32,000:                                                | 59     | 0.0     | 0.0     | 33962   |
| 31,000:                                                | 97     | 0.0     | 0.1     | 32998   |
| 30,000:                                                | 125    | 0.0     | 0.1     | 32152   |
| 29,000:                                                | 209    | 0.0     | 0.1     | 31203   |
| 28,000:                                                | 381    | 0.0     | 0.2     | 30120   |
| 27,000:                                                | 491    | 0.1     | 0.3     | 29227   |
| 26,000:                                                | 700    | 0.1     | 0.4     | 28336   |
| 25,000:                                                | 1,073  | 0.1     | 0.6     | 27385   |
| 24,000:                                                | 1,632  | 0.2     | 0.8     | 26406   |
| 23,000:                                                | 2,357  | 0.3     | 1.2     | 25449   |
| 22,000:                                                | 3,379  | 0.5     | 1.7     | 24498   |
| 21,000:                                                | 4,755  | 0.7     | 2.4     | 23561   |
| 20,000:                                                | 6,890  | 1.0     | 3.3     | 22603   |
| 19,000:                                                | 9,414  | 1.4     | 4.5     | 21673   |
| 18,000:                                                | 12,897 | 1.9     | 6.1     | 20747   |

|         |         |       |       |       |
|---------|---------|-------|-------|-------|
| 17,000: | 17,989  | 2.7   | 8.1   | 19805 |
| 16,000: | 24,912  | 3.8   | 10.8  | 18856 |
| 15,000: | 32,799  | 5.2   | 14.2  | 17933 |
| 14,000: | 43,025  | 7.1   | 18.3  | 17022 |
| 13,000: | 56,405  | 9.5   | 23.3  | 16112 |
| 12,000: | 71,645  | 12.6  | 29.1  | 15219 |
| 11,000: | 88,411  | 16.4  | 35.8  | 14349 |
| 10,000: | 107,611 | 21.1  | 43.2  | 13495 |
| 9,000:  | 127,238 | 26.6  | 51.2  | 12665 |
| 8,000:  | 140,205 | 32.7  | 59.0  | 11890 |
| 7,000:  | 153,409 | 39.3  | 66.5  | 11147 |
| 6,000:  | 173,893 | 46.8  | 73.9  | 10398 |
| 5,000:  | 196,392 | 55.3  | 81.0  | 9644  |
| 4,000:  | 220,778 | 64.9  | 87.5  | 8885  |
| 3,000:  | 234,022 | 75.0  | 92.9  | 8158  |
| 2,000:  | 245,308 | 85.7  | 96.9  | 7455  |
| 1,000:  | 281,860 | 97.9  | 99.7  | 6714  |
| 0:00    | 49,428  | 100.0 | 100.0 | 6588  |

Cvi-0 Dataset, General Statistics

Statistics for all wells of length 500 bases or more

2,411,099 reads out of 2,440,205 ( 98.8%)

14,777,982,500 base pairs out of 14,785,365,866 (100.0%)

6,129 average read length

4,577 standard deviation

| Cvi-0: Distribution of Read Lengths (Bin size = 1,000) |       |         |         |         |
|--------------------------------------------------------|-------|---------|---------|---------|
| Bin:                                                   | Count | % Reads | % Bases | Average |
| 44,000:                                                | 1     | 0.0     | 0.0     | 44472   |
| 43,000:                                                | 0     | 0.0     | 0.0     | 44472   |
| 42,000:                                                | 0     | 0.0     | 0.0     | 44472   |
| 41,000:                                                | 0     | 0.0     | 0.0     | 44472   |
| 40,000:                                                | 0     | 0.0     | 0.0     | 44472   |
| 39,000:                                                | 2     | 0.0     | 0.0     | 41040   |
| 38,000:                                                | 0     | 0.0     | 0.0     | 41040   |
| 37,000:                                                | 1     | 0.0     | 0.0     | 40162   |
| 36,000:                                                | 3     | 0.0     | 0.0     | 38599   |
| 35,000:                                                | 7     | 0.0     | 0.0     | 37006   |
| 34,000:                                                | 20    | 0.0     | 0.0     | 35480   |
| 33,000:                                                | 25    | 0.0     | 0.0     | 34606   |

|         |         |       |       |       |
|---------|---------|-------|-------|-------|
| 32,000: | 55      | 0.0   | 0.0   | 33560 |
| 31,000: | 73      | 0.0   | 0.0   | 32723 |
| 30,000: | 111     | 0.0   | 0.1   | 31886 |
| 29,000: | 207     | 0.0   | 0.1   | 30878 |
| 28,000: | 323     | 0.0   | 0.2   | 29927 |
| 27,000: | 442     | 0.1   | 0.2   | 29068 |
| 26,000: | 670     | 0.1   | 0.4   | 28163 |
| 25,000: | 1,001   | 0.1   | 0.5   | 27245 |
| 24,000: | 1,488   | 0.2   | 0.8   | 26309 |
| 23,000: | 2,204   | 0.3   | 1.1   | 25367 |
| 22,000: | 3,364   | 0.4   | 1.7   | 24391 |
| 21,000: | 4,788   | 0.6   | 2.3   | 23443 |
| 20,000: | 6,740   | 0.9   | 3.3   | 22513 |
| 19,000: | 9,582   | 1.3   | 4.5   | 21577 |
| 18,000: | 13,036  | 1.8   | 6.2   | 20661 |
| 17,000: | 17,795  | 2.6   | 8.3   | 19745 |
| 16,000: | 24,377  | 3.6   | 11.0  | 18822 |
| 15,000: | 33,570  | 5.0   | 14.5  | 17885 |
| 14,000: | 44,442  | 6.8   | 18.9  | 16964 |
| 13,000: | 58,152  | 9.2   | 24.2  | 16053 |
| 12,000: | 72,843  | 12.2  | 30.3  | 15172 |
| 11,000: | 85,481  | 15.8  | 37.0  | 14345 |
| 10,000: | 95,952  | 19.8  | 43.8  | 13569 |
| 9,000:  | 108,327 | 24.3  | 50.7  | 12813 |
| 8,000:  | 123,427 | 29.4  | 57.8  | 12060 |
| 7,000:  | 140,224 | 35.2  | 64.9  | 11305 |
| 6,000:  | 162,836 | 42.0  | 72.1  | 10529 |
| 5,000:  | 187,662 | 49.7  | 79.0  | 9740  |
| 4,000:  | 205,764 | 58.3  | 85.3  | 8972  |
| 3,000:  | 225,114 | 67.6  | 90.6  | 8215  |
| 2,000:  | 285,609 | 79.5  | 95.4  | 7358  |
| 1,000:  | 409,941 | 96.5  | 99.5  | 6324  |
| 0:00    | 85,440  | 100.0 | 100.0 | 6129  |

Cvi-0 x Col-0 Dataset, General Statistics

Statistics for all wells of length 500 bases or more

1,607,065 reads out of 1,637,256 (98.2%)

18,543,189,547 base pairs out of 18,551,762,921 (100.0%)

11,538 average read length

8,219 standard deviation

| Cvi-0 x Col-0 F1: Distribution of Read Lengths (Bin size = 1,000) |     |   |     |       |
|-------------------------------------------------------------------|-----|---|-----|-------|
| 88,000:                                                           | 1   | 0 | 0   | 88007 |
| 87,000:                                                           | 0   | 0 | 0   | 88007 |
| 86,000:                                                           | 0   | 0 | 0   | 88007 |
| 85,000:                                                           | 0   | 0 | 0   | 88007 |
| 84,000:                                                           | 0   | 0 | 0   | 88007 |
| 83,000:                                                           | 0   | 0 | 0   | 88007 |
| 82,000:                                                           | 0   | 0 | 0   | 88007 |
| 81,000:                                                           | 0   | 0 | 0   | 88007 |
| 80,000:                                                           | 0   | 0 | 0   | 88007 |
| 79,000:                                                           | 0   | 0 | 0   | 88007 |
| 78,000:                                                           | 0   | 0 | 0   | 88007 |
| 77,000:                                                           | 0   | 0 | 0   | 88007 |
| 76,000:                                                           | 0   | 0 | 0   | 88007 |
| 75,000:                                                           | 1   | 0 | 0   | 81965 |
| 74,000:                                                           | 0   | 0 | 0   | 81965 |
| 73,000:                                                           | 0   | 0 | 0   | 81965 |
| 72,000:                                                           | 0   | 0 | 0   | 81965 |
| 71,000:                                                           | 0   | 0 | 0   | 81965 |
| 70,000:                                                           | 2   | 0 | 0   | 76109 |
| 69,000:                                                           | 1   | 0 | 0   | 74708 |
| 68,000:                                                           | 1   | 0 | 0   | 73669 |
| 67,000:                                                           | 4   | 0 | 0   | 71283 |
| 66,000:                                                           | 4   | 0 | 0   | 69938 |
| 65,000:                                                           | 7   | 0 | 0   | 68402 |
| 64,000:                                                           | 4   | 0 | 0   | 67755 |
| 63,000:                                                           | 10  | 0 | 0   | 66522 |
| 62,000:                                                           | 11  | 0 | 0   | 65588 |
| 61,000:                                                           | 13  | 0 | 0   | 64710 |
| 60,000:                                                           | 20  | 0 | 0   | 63628 |
| 59,000:                                                           | 18  | 0 | 0   | 62848 |
| 58,000:                                                           | 19  | 0 | 0   | 62115 |
| 57,000:                                                           | 38  | 0 | 0.1 | 60976 |
| 56,000:                                                           | 43  | 0 | 0.1 | 59993 |
| 55,000:                                                           | 52  | 0 | 0.1 | 59047 |
| 54,000:                                                           | 56  | 0 | 0.1 | 58209 |
| 53,000:                                                           | 63  | 0 | 0.1 | 57410 |
| 52,000:                                                           | 69  | 0 | 0.1 | 56637 |
| 51,000:                                                           | 99  | 0 | 0.2 | 55677 |
| 50,000:                                                           | 117 | 0 | 0.2 | 54754 |

|         |        |      |      |       |
|---------|--------|------|------|-------|
| 49,000: | 148    | 0    | 0.2  | 53778 |
| 48,000: | 159    | 0.1  | 0.3  | 52903 |
| 47,000: | 209    | 0.1  | 0.3  | 51937 |
| 46,000: | 256    | 0.1  | 0.4  | 50954 |
| 45,000: | 275    | 0.1  | 0.5  | 50071 |
| 44,000: | 321    | 0.1  | 0.5  | 49181 |
| 43,000: | 443    | 0.2  | 0.6  | 48154 |
| 42,000: | 506    | 0.2  | 0.8  | 47189 |
| 41,000: | 623    | 0.2  | 0.9  | 46202 |
| 40,000: | 776    | 0.3  | 1.1  | 45185 |
| 39,000: | 893    | 0.3  | 1.3  | 44219 |
| 38,000: | 1,226  | 0.4  | 1.5  | 43135 |
| 37,000: | 1,477  | 0.5  | 1.8  | 42086 |
| 36,000: | 1,717  | 0.6  | 2.1  | 41091 |
| 35,000: | 2,151  | 0.7  | 2.6  | 40072 |
| 34,000: | 2,480  | 0.9  | 3    | 39102 |
| 33,000: | 2,991  | 1.1  | 3.6  | 38131 |
| 32,000: | 3,679  | 1.3  | 4.2  | 37141 |
| 31,000: | 4,637  | 1.6  | 5    | 36113 |
| 30,000: | 5,806  | 2    | 5.9  | 35073 |
| 29,000: | 7,042  | 2.4  | 7.1  | 34050 |
| 28,000: | 9,048  | 3    | 8.5  | 32989 |
| 27,000: | 11,084 | 3.6  | 10.1 | 31947 |
| 26,000: | 13,961 | 4.5  | 12.1 | 30895 |
| 25,000: | 17,564 | 5.6  | 14.5 | 29840 |
| 24,000: | 21,597 | 7    | 17.4 | 28805 |
| 23,000: | 26,774 | 8.6  | 20.7 | 27775 |
| 22,000: | 33,490 | 10.7 | 24.8 | 26745 |
| 21,000: | 41,499 | 13.3 | 29.6 | 25721 |
| 20,000: | 51,643 | 16.5 | 35.3 | 24701 |
| 19,000: | 61,925 | 20.4 | 41.8 | 23713 |
| 18,000: | 64,688 | 24.4 | 48.3 | 22853 |
| 17,000: | 52,629 | 27.7 | 53.3 | 22221 |
| 16,000: | 47,252 | 30.6 | 57.5 | 21671 |
| 15,000: | 48,324 | 33.6 | 61.5 | 21118 |
| 14,000: | 50,349 | 36.7 | 65.4 | 20553 |
| 13,000: | 53,757 | 40.1 | 69.3 | 19964 |
| 12,000: | 58,400 | 43.7 | 73.3 | 19343 |
| 11,000: | 63,543 | 47.7 | 77.2 | 18692 |
| 10,000: | 69,103 | 52   | 81.1 | 18013 |
| 9,000:  | 73,373 | 56.5 | 84.9 | 17325 |

|        |         |      |      |       |
|--------|---------|------|------|-------|
| 8,000: | 74,037  | 61.1 | 88.3 | 16660 |
| 7,000: | 66,903  | 65.3 | 91   | 16077 |
| 6,000: | 58,125  | 68.9 | 93   | 15575 |
| 5,000: | 55,580  | 72.4 | 94.7 | 15093 |
| 4,000: | 56,669  | 75.9 | 96   | 14601 |
| 3,000: | 60,483  | 79.7 | 97.2 | 14076 |
| 2,000: | 81,357  | 84.7 | 98.3 | 13382 |
| 1,000: | 202,051 | 97.3 | 99.8 | 11837 |
| 0:00   | 43,389  | 100  | 100  | 11538 |

### V. vinifera Dataset, General Statistics

Statistics for all wells of length 500 bases or more

6,877,303 reads out of 7,001,805 ( 98.2%)

73,666,711,100 base pairs out of 73,701,175,777 (100.0%)

10,711 average read length

7,749 standard deviation

| V. vinifera: Distribution of Read Lengths (Bin size = 1,000) |       |         |         |         |
|--------------------------------------------------------------|-------|---------|---------|---------|
| Bin:                                                         | Count | % Reads | % Bases | Average |
| 79,000:                                                      | 1     | 0       | 0       | 79230   |
| 78,000:                                                      | 0     | 0       | 0       | 79230   |
| 77,000:                                                      | 1     | 0       | 0       | 78345   |
| 76,000:                                                      | 0     | 0       | 0       | 78345   |
| 75,000:                                                      | 2     | 0       | 0       | 76683   |
| 74,000:                                                      | 0     | 0       | 0       | 76683   |
| 73,000:                                                      | 1     | 0       | 0       | 75966   |
| 72,000:                                                      | 2     | 0       | 0       | 74897   |
| 71,000:                                                      | 6     | 0       | 0       | 73320   |
| 70,000:                                                      | 2     | 0       | 0       | 72945   |
| 69,000:                                                      | 4     | 0       | 0       | 72260   |
| 68,000:                                                      | 11    | 0       | 0       | 70913   |
| 67,000:                                                      | 7     | 0       | 0       | 70233   |
| 66,000:                                                      | 12    | 0       | 0       | 69333   |
| 65,000:                                                      | 8     | 0       | 0       | 68812   |
| 64,000:                                                      | 12    | 0       | 0       | 68095   |
| 63,000:                                                      | 30    | 0       | 0       | 66699   |
| 62,000:                                                      | 23    | 0       | 0       | 65903   |
| 61,000:                                                      | 33    | 0       | 0       | 64945   |

|         |         |      |      |       |
|---------|---------|------|------|-------|
| 60,000: | 44      | 0    | 0    | 63960 |
| 59,000: | 54      | 0    | 0    | 62990 |
| 58,000: | 56      | 0    | 0    | 62163 |
| 57,000: | 65      | 0    | 0    | 61347 |
| 56,000: | 91      | 0    | 0    | 60397 |
| 55,000: | 115     | 0    | 0    | 59424 |
| 54,000: | 144     | 0    | 0.1  | 58449 |
| 53,000: | 164     | 0    | 0.1  | 57534 |
| 52,000: | 213     | 0    | 0.1  | 56562 |
| 51,000: | 268     | 0    | 0.1  | 55572 |
| 50,000: | 317     | 0    | 0.1  | 54615 |
| 49,000: | 403     | 0    | 0.2  | 53624 |
| 48,000: | 535     | 0    | 0.2  | 52571 |
| 47,000: | 654     | 0    | 0.2  | 51557 |
| 46,000: | 812     | 0.1  | 0.3  | 50549 |
| 45,000: | 1,014   | 0.1  | 0.3  | 49544 |
| 44,000: | 1,325   | 0.1  | 0.4  | 48502 |
| 43,000: | 1,644   | 0.1  | 0.5  | 47479 |
| 42,000: | 2,085   | 0.1  | 0.6  | 46451 |
| 41,000: | 2,690   | 0.2  | 0.8  | 45411 |
| 40,000: | 3,326   | 0.2  | 1    | 44397 |
| 39,000: | 4,097   | 0.3  | 1.2  | 43404 |
| 38,000: | 5,004   | 0.4  | 1.5  | 42429 |
| 37,000: | 6,310   | 0.5  | 1.8  | 41441 |
| 36,000: | 7,952   | 0.6  | 2.2  | 40444 |
| 35,000: | 9,547   | 0.7  | 2.6  | 39478 |
| 34,000: | 11,761  | 0.9  | 3.2  | 38511 |
| 33,000: | 14,247  | 1.1  | 3.8  | 37556 |
| 32,000: | 17,432  | 1.3  | 4.6  | 36601 |
| 31,000: | 20,967  | 1.7  | 5.5  | 35655 |
| 30,000: | 25,181  | 2    | 6.5  | 34716 |
| 29,000: | 30,584  | 2.5  | 7.8  | 33771 |
| 28,000: | 36,913  | 3    | 9.2  | 32824 |
| 27,000: | 44,021  | 3.6  | 10.8 | 31884 |
| 26,000: | 52,622  | 4.4  | 12.7 | 30946 |
| 25,000: | 62,097  | 5.3  | 14.9 | 30016 |
| 24,000: | 72,809  | 6.4  | 17.3 | 29096 |
| 23,000: | 85,331  | 7.6  | 20   | 28181 |
| 22,000: | 98,502  | 9    | 23   | 27279 |
| 21,000: | 113,186 | 10.7 | 26.3 | 26387 |
| 20,000: | 128,635 | 12.6 | 29.9 | 25508 |

|         |         |      |      |       |
|---------|---------|------|------|-------|
| 19,000: | 144,348 | 14.7 | 33.7 | 24646 |
| 18,000: | 163,242 | 17   | 37.8 | 23788 |
| 17,000: | 183,152 | 19.7 | 42.2 | 22936 |
| 16,000: | 207,348 | 22.7 | 46.8 | 22079 |
| 15,000: | 235,653 | 26.1 | 51.8 | 21215 |
| 14,000: | 265,938 | 30   | 57   | 20348 |
| 13,000: | 288,364 | 34.2 | 62.3 | 19508 |
| 12,000: | 295,618 | 38.5 | 67.3 | 18725 |
| 11,000: | 295,964 | 42.8 | 71.9 | 17998 |
| 10,000: | 300,385 | 47.2 | 76.2 | 17304 |
| 9,000:  | 310,065 | 51.7 | 80.2 | 16622 |
| 8,000:  | 319,726 | 56.3 | 83.9 | 15952 |
| 7,000:  | 330,239 | 61.1 | 87.2 | 15287 |
| 6,000:  | 340,085 | 66.1 | 90.2 | 14629 |
| 5,000:  | 351,942 | 71.2 | 92.9 | 13973 |
| 4,000:  | 370,169 | 76.6 | 95.1 | 13306 |
| 3,000:  | 406,510 | 82.5 | 97   | 12603 |
| 2,000:  | 492,915 | 89.6 | 98.7 | 11792 |
| 1,000:  | 546,266 | 97.6 | 99.8 | 10957 |
| 0:00    | 166,002 | 100  | 100  | 10711 |

Clavicornona pyxidata Dataset, General Statistics

369,622 reads out of 377,554 ( 97.9%)

4,084,017,637 base pairs out of 4,086,359,932 ( 99.9%)

11,049 average read length

7,560 standard deviation

| Clavicornona pyxidata data set: Distribution of Read Lengths (Bin size = 1,000) |       |         |         |         |
|---------------------------------------------------------------------------------|-------|---------|---------|---------|
| Bin:                                                                            | Count | % Reads | % Bases | Average |
| 66,000:                                                                         | 1     | 0       | 0       | 66177   |
| 65,000:                                                                         | 0     | 0       | 0       | 66177   |
| 64,000:                                                                         | 0     | 0       | 0       | 66177   |
| 63,000:                                                                         | 1     | 0       | 0       | 65056   |
| 62,000:                                                                         | 0     | 0       | 0       | 65056   |
| 61,000:                                                                         | 2     | 0       | 0       | 63210   |
| 60,000:                                                                         | 1     | 0       | 0       | 62741   |
| 59,000:                                                                         | 2     | 0       | 0       | 61747   |
| 58,000:                                                                         | 2     | 0       | 0       | 61080   |
| 57,000:                                                                         | 1     | 0       | 0       | 60758   |
| 56,000:                                                                         | 3     | 0       | 0       | 59751   |



|         |        |      |      |       |
|---------|--------|------|------|-------|
| 55,000: | 5      | 0    | 0    | 58531 |
| 54,000: | 7      | 0    | 0    | 57405 |
| 53,000: | 6      | 0    | 0    | 56613 |
| 52,000: | 4      | 0    | 0    | 56130 |
| 51,000: | 10     | 0    | 0.1  | 55108 |
| 50,000: | 12     | 0    | 0.1  | 54126 |
| 49,000: | 12     | 0    | 0.1  | 53311 |
| 48,000: | 14     | 0    | 0.1  | 52489 |
| 47,000: | 21     | 0    | 0.1  | 51463 |
| 46,000: | 36     | 0    | 0.2  | 50182 |
| 45,000: | 33     | 0    | 0.2  | 49280 |
| 44,000: | 50     | 0.1  | 0.3  | 48204 |
| 43,000: | 66     | 0.1  | 0.3  | 47113 |
| 42,000: | 75     | 0.1  | 0.4  | 46156 |
| 41,000: | 96     | 0.1  | 0.5  | 45180 |
| 40,000: | 125    | 0.2  | 0.6  | 44174 |
| 39,000: | 172    | 0.2  | 0.8  | 43113 |
| 38,000: | 222    | 0.3  | 1    | 42064 |
| 37,000: | 260    | 0.3  | 1.2  | 41098 |
| 36,000: | 318    | 0.4  | 1.5  | 40159 |
| 35,000: | 408    | 0.5  | 1.9  | 39189 |
| 34,000: | 484    | 0.7  | 2.3  | 38258 |
| 33,000: | 633    | 0.8  | 2.8  | 37277 |
| 32,000: | 746    | 1    | 3.4  | 36342 |
| 31,000: | 966    | 1.3  | 4.2  | 35360 |
| 30,000: | 1,177  | 1.6  | 5    | 34396 |
| 29,000: | 1,422  | 2    | 6.1  | 33449 |
| 28,000: | 1,830  | 2.5  | 7.3  | 32461 |
| 27,000: | 2,121  | 3.1  | 8.8  | 31529 |
| 26,000: | 2,622  | 3.8  | 10.5 | 30580 |
| 25,000: | 3,293  | 4.7  | 12.5 | 29607 |
| 24,000: | 3,974  | 5.7  | 14.9 | 28648 |
| 23,000: | 4,786  | 7    | 17.6 | 27699 |
| 22,000: | 5,857  | 8.6  | 20.9 | 26741 |
| 21,000: | 7,033  | 10.5 | 24.6 | 25790 |
| 20,000: | 8,750  | 12.9 | 29   | 24815 |
| 19,000: | 10,384 | 15.7 | 33.9 | 23862 |
| 18,000: | 12,035 | 19   | 39.4 | 22940 |
| 17,000: | 12,592 | 22.4 | 44.8 | 22111 |
| 16,000: | 12,586 | 25.8 | 49.8 | 21369 |
| 15,000: | 12,822 | 29.2 | 54.7 | 20672 |

|         |        |      |      |       |
|---------|--------|------|------|-------|
| 14,000: | 12,869 | 32.7 | 59.3 | 20015 |
| 13,000: | 13,527 | 36.4 | 63.7 | 19359 |
| 12,000: | 14,116 | 40.2 | 68.1 | 18707 |
| 11,000: | 15,320 | 44.3 | 72.4 | 18032 |
| 10,000: | 16,476 | 48.8 | 76.6 | 17344 |
| 9,000:  | 17,543 | 53.5 | 80.7 | 16648 |
| 8,000:  | 18,445 | 58.5 | 84.5 | 15953 |
| 7,000:  | 19,182 | 63.7 | 88   | 15264 |
| 6,000:  | 19,208 | 68.9 | 91.1 | 14603 |
| 5,000:  | 19,115 | 74.1 | 93.7 | 13968 |
| 4,000:  | 19,933 | 79.5 | 95.9 | 13325 |
| 3,000:  | 20,392 | 85   | 97.6 | 12687 |
| 2,000:  | 21,739 | 90.9 | 98.9 | 12027 |
| 1,000:  | 23,792 | 97.3 | 99.8 | 11332 |
| 0:00    | 9,887  | 100  | 100  | 11049 |

Supplementary Table 2. Concordance of *Arabidopsis* TAIR10 with Falcon assembly of *Arabidopsis* Col-0

| Ref start | Ref end | Query start | Query end | R-alignment len | Q-alignment leng | Alignment Identity | Reference length | Query length | Reference name  | Query name |
|-----------|---------|-------------|-----------|-----------------|------------------|--------------------|------------------|--------------|-----------------|------------|
| 7078998   | 7349609 | 270614      | 1         | 270612          | 270614           | 99.99              | 7352871          | 30427671     | 000006F  quiver | Chr1       |
| 4891941   | 7078731 | 2457266     | 270496    | 2186791         | 2186771          | 99.99              | 7352871          | 30427671     | 000006F  quiver | Chr1       |
| 1144744   | 1157712 | 6191529     | 6204497   | 12969           | 12969            | 99.95              | 7352871          | 30427671     | 000006F  quiver | Chr1       |
| 1151846   | 4886129 | 6197390     | 2463078   | 3734284         | 3734313          | 99.99              | 7352871          | 30427671     | 000006F  quiver | Chr1       |
| 1         | 1150604 | 7349246     | 6198632   | 1150604         | 1150615          | 99.99              | 7352871          | 30427671     | 000006F  quiver | Chr1       |
| 1325616   | 1403650 | 7437344     | 7359313   | 78035           | 78032            | 99.95              | 1403650          | 30427671     | 000017F  quiver | Chr1       |
| 1086349   | 1326124 | 7675971     | 7436196   | 239776          | 239776           | 99.99              | 1403650          | 30427671     | 000017F  quiver | Chr1       |
| 215492    | 1086247 | 8546721     | 7675959   | 870756          | 870763           | 99.99              | 1403650          | 30427671     | 000017F  quiver | Chr1       |
| 1         | 215363  | 8762075     | 8546715   | 215363          | 215361           | 99.99              | 1403650          | 30427671     | 000017F  quiver | Chr1       |
| 1         | 160129  | 8840477     | 9000590   | 160129          | 160114           | 99.99              | 3935192          | 30427671     | 000011F  quiver | Chr1       |
| 160081    | 531303  | 9000591     | 9371815   | 371223          | 371225           | 99.99              | 3935192          | 30427671     | 000011F  quiver | Chr1       |
| 531380    | 3052185 | 9371718     | 11892533  | 2520806         | 2520816          | 99.99              | 3935192          | 30427671     | 000011F  quiver | Chr1       |
| 3051726   | 3935192 | 11891849    | 12775311  | 883467          | 883463           | 99.99              | 3935192          | 30427671     | 000011F  quiver | Chr1       |
| 1         | 388699  | 12812556    | 13201252  | 388699          | 388697           | 99.99              | 1278374          | 30427671     | 000020F  quiver | Chr1       |
| 388696    | 1180431 | 13201353    | 13993095  | 791736          | 791743           | 99.99              | 1278374          | 30427671     | 000020F  quiver | Chr1       |
| 1180423   | 1274678 | 13993196    | 14087450  | 94256           | 94255            | 99.99              | 1278374          | 30427671     | 000020F  quiver | Chr1       |
| 208199    | 254729  | 14139823    | 14093292  | 46531           | 46532            | 99.99              | 254729           | 30427671     | 000033F  quiver | Chr1       |
| 92090     | 208159  | 14255823    | 14139755  | 116070          | 116069           | 99.99              | 254729           | 30427671     | 000033F  quiver | Chr1       |
| 55425     | 91727   | 14292120    | 14255818  | 36303           | 36303            | 100                | 254729           | 30427671     | 000033F  quiver | Chr1       |
| 41349     | 58910   | 14309681    | 14292121  | 17562           | 17561            | 99.99              | 254729           | 30427671     | 000033F  quiver | Chr1       |
| 379       | 34445   | 14343812    | 14309746  | 34067           | 34067            | 100                | 254729           | 30427671     | 000033F  quiver | Chr1       |
| 1         | 66899   | 14394916    | 14461807  | 66899           | 66892            | 99.87              | 66899            | 30427671     | 000040F  quiver | Chr1       |
| 1         | 47412   | 14461808    | 14509220  | 47412           | 47413            | 99.95              | 109436           | 30427671     | 000036F  quiver | Chr1       |
| 57618     | 84465   | 14581720    | 14608570  | 26848           | 26851            | 99.74              | 109436           | 30427671     | 000036F  quiver | Chr1       |
| 27627     | 48531   | 14685672    | 14664773  | 20905           | 20900            | 99.92              | 288146           | 30427671     | 000031F  quiver | Chr1       |
| 1         | 27504   | 14713209    | 14685704  | 27504           | 27506            | 99.98              | 288146           | 30427671     | 000031F  quiver | Chr1       |
| 87024     | 99326   | 14745975    | 14733674  | 12303           | 12302            | 99.89              | 109436           | 30427671     | 000036F  quiver | Chr1       |
| 47660     | 126278  | 14864080    | 14942697  | 78619           | 78618            | 99.67              | 288146           | 30427671     | 000031F  quiver | Chr1       |
| 115496    | 148597  | 14929379    | 14962555  | 33102           | 33177            | 96.39              | 288146           | 30427671     | 000031F  quiver | Chr1       |
| 158076    | 174997  | 14968509    | 14985435  | 16922           | 16927            | 97.63              | 288146           | 30427671     | 000031F  quiver | Chr1       |
| 167323    | 221752  | 14976654    | 15031086  | 54430           | 54433            | 98.15              | 288146           | 30427671     | 000031F  quiver | Chr1       |
| 225384    | 246942  | 15025629    | 15047216  | 21559           | 21588            | 98.89              | 288146           | 30427671     | 000031F  quiver | Chr1       |
| 13269     | 23903   | 15042083    | 15052791  | 10635           | 10709            | 98.37              | 28341            | 30427671     | 000055F  quiver | Chr1       |
| 1         | 30590   | 15055154    | 15085737  | 30590           | 30584            | 99.88              | 30605            | 30427671     | 000054F  quiver | Chr1       |
| 1         | 17372   | 15104420    | 15087046  | 17372           | 17375            | 99.8               | 31698            | 30427671     | 000051F  quiver | Chr1       |
| 10894     | 25271   | 15148808    | 15134443  | 14378           | 14366            | 97.77              | 31698            | 30427671     | 000051F  quiver | Chr1       |
| 1         | 34047   | 15178509    | 15144444  | 34047           | 34066            | 99.9               | 34047            | 30427671     | 000050F  quiver | Chr1       |
| 48460     | 74989   | 15215965    | 15189428  | 26530           | 26538            | 99.95              | 481716           | 30427671     | 000026F  quiver | Chr1       |
| 15011     | 49657   | 15215966    | 15250682  | 34647           | 34717            | 98.62              | 60279            | 30427671     | 000041F  quiver | Chr1       |
| 439897    | 469971  | 15290002    | 15259919  | 30075           | 30084            | 99.86              | 469973           | 30427671     | 000028F  quiver | Chr1       |
| 146769    | 459922  | 15313131    | 15269984  | 43154           | 43148            | 99.98              | 469973           | 30427671     | 000028F  quiver | Chr1       |
| 47896     | 60279   | 15346528    | 15359009  | 12384           | 12482            | 97.55              | 60279            | 30427671     | 000041F  quiver | Chr1       |
| 406034    | 419491  | 15424579    | 15411105  | 13458           | 13475            | 99.35              | 469973           | 30427671     | 000028F  quiver | Chr1       |
| 340305    | 377827  | 15474161    | 15436643  | 37523           | 37519            | 99.64              | 469973           | 30427671     | 000028F  quiver | Chr1       |
| 175477    | 358718  | 15645930    | 15462688  | 183242          | 183243           | 99.96              | 469973           | 30427671     | 000028F  quiver | Chr1       |
| 1         | 175382  | 15821252    | 15645865  | 175382          | 175388           | 99.99              | 469973           | 30427671     | 000028F  quiver | Chr1       |
| 988769    | 1207586 | 16053016    | 15834196  | 218818          | 218821           | 99.98              | 1207586          | 30427671     | 000022F  quiver | Chr1       |
| 813951    | 988766  | 16227776    | 16052939  | 174816          | 174838           | 99.92              | 1207586          | 30427671     | 000022F  quiver | Chr1       |
| 746514    | 824594  | 16291877    | 16213797  | 78081           | 78081            | 99.72              | 1207586          | 30427671     | 000022F  quiver | Chr1       |
| 731138    | 743043  | 16296261    | 16284350  | 11906           | 11912            | 99.78              | 1207586          | 30427671     | 000022F  quiver | Chr1       |
| 743071    | 754042  | 16307255    | 16296289  | 10972           | 10967            | 99.75              | 1207586          | 30427671     | 000022F  quiver | Chr1       |
| 299963    | 734577  | 16738427    | 16303816  | 434615          | 434612           | 99.98              | 1207586          | 30427671     | 000022F  quiver | Chr1       |
| 21004     | 299937  | 17016715    | 16737793  | 278934          | 278923           | 99.99              | 1207586          | 30427671     | 000022F  quiver | Chr1       |
| 1         | 41028   | 17037718    | 16996697  | 41028           | 41022            | 99.99              | 1207586          | 30427671     | 000022F  quiver | Chr1       |
| 1         | 91641   | 17046923    | 17138573  | 91641           | 91651            | 99.91              | 4248075          | 30427671     | 000010F  quiver | Chr1       |
| 88850     | 295844  | 17142724    | 17349749  | 206995          | 207026           | 99.92              | 4248075          | 30427671     | 000010F  quiver | Chr1       |
| 275785    | 585461  | 17329682    | 17639368  | 309677          | 309687           | 99.99              | 4248075          | 30427671     | 000010F  quiver | Chr1       |
| 585453    | 964409  | 17639469    | 18018425  | 378957          | 378957           | 99.99              | 4248075          | 30427671     | 000010F  quiver | Chr1       |
| 968178    | 1709890 | 18013162    | 18754885  | 741713          | 741724           | 99.99              | 4248075          | 30427671     | 000010F  quiver | Chr1       |
| 1689856   | 2407900 | 18734845    | 19452896  | 718045          | 718052           | 99.99              | 4248075          | 30427671     | 000010F  quiver | Chr1       |
| 2408216   | 2501755 | 19452852    | 19546433  | 93540           | 93582            | 99.93              | 4248075          | 30427671     | 000010F  quiver | Chr1       |
| 2507169   | 2723277 | 19531199    | 19747344  | 216109          | 216146           | 99.93              | 4248075          | 30427671     | 000010F  quiver | Chr1       |
| 2703292   | 3066150 | 19727350    | 20090217  | 362859          | 362868           | 99.99              | 4248075          | 30427671     | 000010F  quiver | Chr1       |
| 3066187   | 3451888 | 20090212    | 20475918  | 385702          | 385707           | 99.99              | 4248075          | 30427671     | 000010F  quiver | Chr1       |
| 3452050   | 3916879 | 20475910    | 20940729  | 464830          | 464820           | 99.99              | 4248075          | 30427671     | 000010F  quiver | Chr1       |
| 3920184   | 3955847 | 20944034    | 20979699  | 35664           | 35666            | 99.98              | 4248075          | 30427671     | 000010F  quiver | Chr1       |
| 3956213   | 4248075 | 20979650    | 21271521  | 291863          | 291872           | 99.99              | 4248075          | 30427671     | 000010F  quiver | Chr1       |
| 1         | 298479  | 21312897    | 21611374  | 298479          | 298478           | 99.97              | 471830           | 30427671     | 000027F  quiver | Chr1       |
| 298035    | 467221  | 21607610    | 21776799  | 169187          | 169190           | 99.99              | 471830           | 30427671     | 000027F  quiver | Chr1       |
| 1         | 231218  | 21830915    | 22062137  | 231218          | 231223           | 99.99              | 8608368          | 30427671     | 000004F  quiver | Chr1       |

|          |          |          |          |         |         |       |          |          |         |        |      |
|----------|----------|----------|----------|---------|---------|-------|----------|----------|---------|--------|------|
| 229872   | 4070856  | 22059127 | 25900116 | 3840985 | 3840990 | 99.99 | 8608368  | 30427671 | 000004F | quiver | Chr1 |
| 4050864  | 6708196  | 25880118 | 28537489 | 2657333 | 2657372 | 99.99 | 8608368  | 30427671 | 000004F | quiver | Chr1 |
| 6708192  | 6960071  | 28537590 | 28789478 | 251880  | 251889  | 99.99 | 8608368  | 30427671 | 000004F | quiver | Chr1 |
| 6959654  | 7476465  | 28788838 | 29305647 | 516812  | 516810  | 99.99 | 8608368  | 30427671 | 000004F | quiver | Chr1 |
| 7477803  | 7522330  | 29300709 | 29345245 | 44528   | 44537   | 99.84 | 8608368  | 30427671 | 000004F | quiver | Chr1 |
| 7522413  | 8604838  | 29345233 | 30427671 | 1082426 | 1082439 | 99.99 | 8608368  | 30427671 | 000004F | quiver | Chr1 |
| 4042     | 31492    | 28151    | 55627    | 27451   | 27477   | 99.87 | 3248763  | 19698289 | 000012F | quiver | Chr2 |
| 34624    | 876102   | 49788    | 891285   | 841479  | 841498  | 99.99 | 3248763  | 19698289 | 000012F | quiver | Chr2 |
| 876756   | 909102   | 891939   | 924284   | 32347   | 32346   | 99.99 | 3248763  | 19698289 | 000012F | quiver | Chr2 |
| 909232   | 2182823  | 924279   | 2197880  | 1273592 | 1273602 | 99.99 | 3248763  | 19698289 | 000012F | quiver | Chr2 |
| 2182532  | 2527744  | 2197060  | 2542272  | 345213  | 345213  | 99.99 | 3248763  | 19698289 | 000012F | quiver | Chr2 |
| 2528046  | 2614941  | 2542216  | 2629114  | 86896   | 86899   | 99.99 | 3248763  | 19698289 | 000012F | quiver | Chr2 |
| 2615223  | 2666716  | 2629109  | 2680595  | 51494   | 51487   | 99.96 | 3248763  | 19698289 | 000012F | quiver | Chr2 |
| 2667027  | 3097575  | 2680354  | 3110909  | 430549  | 430556  | 99.99 | 3248763  | 19698289 | 000012F | quiver | Chr2 |
| 3097744  | 3248763  | 3110724  | 3261751  | 151020  | 151028  | 99.98 | 3248763  | 19698289 | 000012F | quiver | Chr2 |
| 1        | 21020    | 3364793  | 3385826  | 21020   | 21034   | 99.85 | 21020    | 19698289 | 000060F | quiver | Chr2 |
| 16156    | 46452    | 3375632  | 3405894  | 30297   | 30263   | 99.77 | 46452    | 19698289 | 000045F | quiver | Chr2 |
| 32707    | 97636    | 3571884  | 3506953  | 64930   | 64932   | 99.99 | 97636    | 19698289 | 000037F | quiver | Chr2 |
| 1        | 32708    | 3604206  | 3571500  | 32708   | 32707   | 99.99 | 97636    | 19698289 | 000037F | quiver | Chr2 |
| 1006206  | 1377912  | 4005117  | 3633424  | 371707  | 371694  | 99.92 | 1399302  | 19698289 | 000018F | quiver | Chr2 |
| 783706   | 884384   | 4092541  | 3991886  | 100679  | 100656  | 99.96 | 884384   | 19698289 | 000023F | quiver | Chr2 |
| 226007   | 803682   | 4650238  | 4072593  | 577676  | 577646  | 99.99 | 884384   | 19698289 | 000023F | quiver | Chr2 |
| 90866    | 225983   | 4785358  | 4650212  | 135118  | 135147  | 99.97 | 884384   | 19698289 | 000023F | quiver | Chr2 |
| 1        | 110848   | 4876224  | 4765348  | 110848  | 110877  | 99.97 | 884384   | 19698289 | 000023F | quiver | Chr2 |
| 1        | 111563   | 4885389  | 4996951  | 111563  | 111563  | 99.99 | 312162   | 19698289 | 000030F | quiver | Chr2 |
| 111734   | 312161   | 4996915  | 5197342  | 200428  | 200428  | 99.99 | 312162   | 19698289 | 000030F | quiver | Chr2 |
| 410560   | 481716   | 5276667  | 5205497  | 71157   | 71171   | 99.94 | 481716   | 19698289 | 000026F | quiver | Chr2 |
| 94940    | 409480   | 5572058  | 5257490  | 314541  | 314569  | 99.97 | 481716   | 19698289 | 000026F | quiver | Chr2 |
| 6986697  | 7015408  | 5589101  | 5560386  | 28712   | 28716   | 99.94 | 7015408  | 19698289 | 000008F | quiver | Chr2 |
| 6625687  | 6986669  | 5950039  | 5589048  | 360983  | 360992  | 99.99 | 7015408  | 19698289 | 000008F | quiver | Chr2 |
| 6562929  | 6625831  | 6012456  | 5949561  | 62903   | 62896   | 99.95 | 7015408  | 19698289 | 000008F | quiver | Chr2 |
| 5955923  | 6583110  | 6619471  | 5992283  | 627188  | 627189  | 99.99 | 7015408  | 19698289 | 000008F | quiver | Chr2 |
| 5836896  | 5955968  | 6738546  | 6619472  | 119073  | 119075  | 99.99 | 7015408  | 19698289 | 000008F | quiver | Chr2 |
| 5565086  | 5836796  | 7010187  | 6738474  | 271711  | 271714  | 99.99 | 7015408  | 19698289 | 000008F | quiver | Chr2 |
| 4548577  | 5565067  | 8021663  | 7005164  | 1016491 | 1016500 | 99.99 | 7015408  | 19698289 | 000008F | quiver | Chr2 |
| 4188052  | 4548524  | 8382023  | 8021556  | 360473  | 360468  | 99.99 | 7015408  | 19698289 | 000008F | quiver | Chr2 |
| 1936903  | 4188191  | 10633155 | 8381942  | 2251289 | 2251214 | 99.99 | 7015408  | 19698289 | 000008F | quiver | Chr2 |
| 1918169  | 1947456  | 10651889 | 10622602 | 29288   | 29288   | 99.84 | 7015408  | 19698289 | 000008F | quiver | Chr2 |
| 1        | 1917990  | 12569883 | 10651873 | 1917990 | 1918011 | 99.99 | 7015408  | 19698289 | 000008F | quiver | Chr2 |
| 1        | 516520   | 12578849 | 13095378 | 516520  | 516530  | 99.99 | 2001157  | 19698289 | 000014F | quiver | Chr2 |
| 516801   | 1380669  | 13095175 | 13959056 | 863869  | 863882  | 99.99 | 2001157  | 19698289 | 000014F | quiver | Chr2 |
| 1382202  | 2001157  | 13959050 | 14578029 | 618956  | 618980  | 99.99 | 2001157  | 19698289 | 000014F | quiver | Chr2 |
| 1        | 1057239  | 14566543 | 15623786 | 1057239 | 1057244 | 99.99 | 5134905  | 19698289 | 000009F | quiver | Chr2 |
| 1057279  | 1282939  | 15623761 | 15849390 | 225661  | 225630  | 99.98 | 5134905  | 19698289 | 000009F | quiver | Chr2 |
| 1283038  | 1773267  | 15849360 | 16339598 | 490230  | 490239  | 99.99 | 5134905  | 19698289 | 000009F | quiver | Chr2 |
| 1773242  | 2536545  | 16339617 | 17102936 | 763304  | 763320  | 99.99 | 5134905  | 19698289 | 000009F | quiver | Chr2 |
| 2536645  | 3380148  | 17102929 | 17946444 | 843504  | 843516  | 99.99 | 5134905  | 19698289 | 000009F | quiver | Chr2 |
| 3382857  | 3506493  | 17946028 | 18069649 | 123637  | 123622  | 99.95 | 5134905  | 19698289 | 000009F | quiver | Chr2 |
| 3486510  | 4537408  | 18049682 | 19100540 | 1050899 | 1050859 | 99.99 | 5134905  | 19698289 | 000009F | quiver | Chr2 |
| 4537528  | 5134900  | 19100450 | 19697819 | 597373  | 597370  | 99.99 | 5134905  | 19698289 | 000009F | quiver | Chr2 |
| 10232144 | 12193761 | 1961732  | 104      | 1961618 | 1961629 | 99.99 | 12197075 | 23459830 | 000000F | quiver | Chr3 |
| 10111995 | 10232145 | 2079348  | 1959228  | 120151  | 120121  | 99.97 | 12197075 | 23459830 | 000000F | quiver | Chr3 |
| 8055240  | 10131973 | 4136119  | 2059400  | 2076734 | 2076720 | 99.99 | 12197075 | 23459830 | 000000F | quiver | Chr3 |
| 6853390  | 8055179  | 5337862  | 4136084  | 1201790 | 1201779 | 99.99 | 12197075 | 23459830 | 000000F | quiver | Chr3 |
| 4335779  | 6873406  | 7855486  | 5317872  | 2537628 | 2537615 | 99.99 | 12197075 | 23459830 | 000000F | quiver | Chr3 |
| 4127044  | 4339843  | 8073283  | 7860518  | 212800  | 212766  | 99.98 | 12197075 | 23459830 | 000000F | quiver | Chr3 |
| 3299009  | 4147061  | 8901305  | 8053302  | 848053  | 848004  | 99.99 | 12197075 | 23459830 | 000000F | quiver | Chr3 |
| 3092578  | 3298164  | 9106883  | 8901293  | 205587  | 205591  | 99.99 | 12197075 | 23459830 | 000000F | quiver | Chr3 |
| 3027612  | 3092586  | 9171882  | 9106911  | 64975   | 64972   | 99.99 | 12197075 | 23459830 | 000000F | quiver | Chr3 |
| 2746751  | 3027619  | 9452856  | 9171983  | 280869  | 280874  | 99.99 | 12197075 | 23459830 | 000000F | quiver | Chr3 |
| 2204536  | 2755019  | 9986808  | 9436328  | 550484  | 550481  | 99.99 | 12197075 | 23459830 | 000000F | quiver | Chr3 |
| 3451     | 18233    | 10545940 | 10560722 | 14783   | 14783   | 99.95 | 18233    | 23459830 | 361     | quiver | Chr3 |
| 1634081  | 2224565  | 10557296 | 9966786  | 590485  | 590511  | 99.97 | 12197075 | 23459830 | 000000F | quiver | Chr3 |
| 1        | 14807    | 10560723 | 10575507 | 14807   | 14785   | 98.96 | 18233    | 23459830 | 361     | quiver | Chr3 |
| 855441   | 1645415  | 11354159 | 10564173 | 789975  | 789987  | 99.99 | 12197075 | 23459830 | 000000F | quiver | Chr3 |
| 687864   | 850871   | 11522400 | 11359418 | 163008  | 162983  | 99.98 | 12197075 | 23459830 | 000000F | quiver | Chr3 |
| 608498   | 707833   | 11601766 | 11502462 | 99336   | 99305   | 99.95 | 12197075 | 23459830 | 000000F | quiver | Chr3 |
| 447775   | 609764   | 11761232 | 11599235 | 161990  | 161998  | 99.99 | 12197075 | 23459830 | 000000F | quiver | Chr3 |
| 40767    | 467804   | 12168252 | 11741195 | 427038  | 427058  | 99.99 | 12197075 | 23459830 | 000000F | quiver | Chr3 |
| 1        | 40567    | 12208744 | 12168178 | 40567   | 40567   | 99.99 | 12197075 | 23459830 | 000000F | quiver | Chr3 |
| 906201   | 1364645  | 12680434 | 12221989 | 458445  | 458446  | 99.99 | 1364645  | 23459830 | 000019F | quiver | Chr3 |
| 826695   | 926198   | 12759944 | 12660443 | 99504   | 99502   | 99.99 | 1364645  | 23459830 | 000019F | quiver | Chr3 |
| 723684   | 825948   | 12862195 | 12759927 | 102265  | 102269  | 99.99 | 1364645  | 23459830 | 000019F | quiver | Chr3 |
| 563254   | 743669   | 13022636 | 12842202 | 180416  | 180435  | 99.99 | 1364645  | 23459830 | 000019F | quiver | Chr3 |
| 182881   | 563255   | 13403107 | 13022737 | 380375  | 380371  | 99.99 | 1364645  | 23459830 | 000019F | quiver | Chr3 |
| 169991   | 182231   | 13415292 | 13403052 | 12241   | 12241   | 100   | 1364645  | 23459830 | 000019F | quiver | Chr3 |

|          |          |          |          |         |         |       |          |          |         |        |      |
|----------|----------|----------|----------|---------|---------|-------|----------|----------|---------|--------|------|
| 1        | 169960   | 13585245 | 13415281 | 169960  | 169965  | 99.99 | 1364645  | 23459830 | 000019F | quiver | Chr3 |
| 1        | 89109    | 13596544 | 13685689 | 89109   | 89146   | 99.74 | 90176    | 23459830 | 000038F | quiver | Chr3 |
| 1        | 30630    | 13809497 | 13840151 | 30630   | 30650   | 99.2  | 39023    | 23459830 | 000048F | quiver | Chr3 |
| 14775    | 276624   | 14132041 | 13870192 | 261850  | 261850  | 99.99 | 288346   | 23459830 | 000032F | quiver | Chr3 |
| 1        | 20777    | 14162404 | 14141629 | 20777   | 20776   | 99.99 | 288346   | 23459830 | 000032F | quiver | Chr3 |
| 18990    | 30077    | 14192869 | 14203967 | 11088   | 11099   | 99.7  | 31939    | 23459830 | 000052F | quiver | Chr3 |
| 10119    | 20905    | 14194393 | 14205200 | 10787   | 10808   | 99.33 | 31939    | 23459830 | 000052F | quiver | Chr3 |
| 1        | 282748   | 14235095 | 14517844 | 282748  | 282750  | 99.99 | 9254201  | 23459830 | 000002F | quiver | Chr3 |
| 272710   | 897158   | 14507806 | 15132294 | 624449  | 624489  | 99.98 | 9254201  | 23459830 | 000002F | quiver | Chr3 |
| 917169   | 1523928  | 15132546 | 15739312 | 606760  | 606767  | 99.99 | 9254201  | 23459830 | 000002F | quiver | Chr3 |
| 1524080  | 7034002  | 15739177 | 21249142 | 5509923 | 5509966 | 99.99 | 9254201  | 23459830 | 000002F | quiver | Chr3 |
| 7014004  | 7496469  | 21229150 | 21711594 | 482466  | 482445  | 99.99 | 9254201  | 23459830 | 000002F | quiver | Chr3 |
| 7476466  | 7789968  | 21691602 | 22005064 | 313503  | 313463  | 99.98 | 9254201  | 23459830 | 000002F | quiver | Chr3 |
| 7769997  | 9244669  | 21985125 | 23459789 | 1474673 | 1474665 | 99.99 | 9254201  | 23459830 | 000002F | quiver | Chr3 |
| 1035849  | 1694392  | 659544   | 1001     | 658544  | 658544  | 99.99 | 1712756  | 18585056 | 000015F | quiver | Chr4 |
| 936348   | 1035623  | 758786   | 659517   | 99276   | 99270   | 99.99 | 1712756  | 18585056 | 000015F | quiver | Chr4 |
| 828213   | 956404   | 866927   | 738735   | 128192  | 128193  | 99.99 | 1712756  | 18585056 | 000015F | quiver | Chr4 |
| 1        | 828426   | 1694948  | 866516   | 828426  | 828433  | 99.99 | 1712756  | 18585056 | 000015F | quiver | Chr4 |
| 1748     | 171212   | 1739739  | 1909213  | 169465  | 169475  | 99.93 | 177588   | 18585056 | 000034F | quiver | Chr4 |
| 981247   | 1015859  | 1934152  | 1899590  | 34613   | 34563   | 99.16 | 1399302  | 18585056 | 000018F | quiver | Chr4 |
| 1        | 1001222  | 2915404  | 1914205  | 1001222 | 1001200 | 99.99 | 1399302  | 18585056 | 000018F | quiver | Chr4 |
| 143      | 59479    | 2958326  | 3017650  | 59337   | 59325   | 98.79 | 59479    | 18585056 | 000042F | quiver | Chr4 |
| 28550    | 58790    | 3053301  | 3023061  | 30241   | 30241   | 99.99 | 58790    | 18585056 | 000043F | quiver | Chr4 |
| 110021   | 152297   | 3099998  | 3057723  | 42277   | 42276   | 99.97 | 152297   | 18585056 | 000035F | quiver | Chr4 |
| 4        | 110326   | 3210300  | 3099999  | 110323  | 110302  | 99.87 | 152297   | 18585056 | 000035F | quiver | Chr4 |
| 1        | 25913    | 3219134  | 3245079  | 25913   | 25946   | 99.71 | 40192    | 18585056 | 000047F | quiver | Chr4 |
| 1        | 16043    | 3231147  | 3215031  | 16043   | 16117   | 99.29 | 16043    | 18585056 | 000074F | quiver | Chr4 |
| 21882    | 40192    | 3231961  | 3250305  | 18311   | 18345   | 99.1  | 40192    | 18585056 | 000047F | quiver | Chr4 |
| 373908   | 626050   | 3507966  | 3255803  | 252143  | 252164  | 99.98 | 626050   | 18585056 | 000025F | quiver | Chr4 |
| 343306   | 369181   | 3533832  | 3507956  | 25876   | 25877   | 99.96 | 626050   | 18585056 | 000025F | quiver | Chr4 |
| 220786   | 343905   | 3656043  | 3532934  | 123120  | 123110  | 99.98 | 626050   | 18585056 | 000025F | quiver | Chr4 |
| 203464   | 220012   | 3671924  | 3655376  | 16549   | 16549   | 99.86 | 626050   | 18585056 | 000025F | quiver | Chr4 |
| 1        | 203471   | 3874892  | 3671445  | 203471  | 203448  | 99.87 | 626050   | 18585056 | 000025F | quiver | Chr4 |
| 1        | 71253    | 3947540  | 3876287  | 71253   | 71254   | 99.99 | 71253    | 18585056 | 000039F | quiver | Chr4 |
| 6990773  | 7047406  | 4062866  | 4006232  | 56634   | 56635   | 99.3  | 7047406  | 18585056 | 000007F | quiver | Chr4 |
| 6470220  | 6994859  | 4583291  | 4058618  | 524640  | 524674  | 99.83 | 7047406  | 18585056 | 000007F | quiver | Chr4 |
| 6270402  | 6472635  | 4782139  | 4579906  | 202234  | 202234  | 99.96 | 7047406  | 18585056 | 000007F | quiver | Chr4 |
| 5446841  | 6256186  | 5586563  | 4777208  | 809346  | 809356  | 99.99 | 7047406  | 18585056 | 000007F | quiver | Chr4 |
| 5154323  | 5448862  | 5876111  | 5581567  | 294540  | 294545  | 99.98 | 7047406  | 18585056 | 000007F | quiver | Chr4 |
| 4371611  | 5173406  | 6676187  | 5874321  | 801796  | 801867  | 99.99 | 7047406  | 18585056 | 000007F | quiver | Chr4 |
| 3823127  | 4381573  | 7224669  | 6666225  | 558447  | 558445  | 99.99 | 7047406  | 18585056 | 000007F | quiver | Chr4 |
| 1864772  | 3843117  | 9182963  | 7204688  | 1978346 | 1978276 | 99.97 | 7047406  | 18585056 | 000007F | quiver | Chr4 |
| 1822441  | 1853899  | 9223909  | 9192434  | 31459   | 31476   | 99.88 | 7047406  | 18585056 | 000007F | quiver | Chr4 |
| 1725808  | 1842409  | 9320553  | 9203921  | 116602  | 116633  | 99.93 | 7047406  | 18585056 | 000007F | quiver | Chr4 |
| 1700541  | 1720810  | 9343615  | 9323346  | 20270   | 20270   | 99.97 | 7047406  | 18585056 | 000007F | quiver | Chr4 |
| 1        | 1697731  | 11043496 | 9345767  | 1697731 | 1697730 | 99.98 | 7047406  | 18585056 | 000007F | quiver | Chr4 |
| 1        | 115712   | 11093724 | 11209436 | 115712  | 115713  | 99.97 | 7496166  | 18585056 | 000005F | quiver | Chr4 |
| 114890   | 661889   | 11208536 | 11755551 | 547000  | 547016  | 99.99 | 7496166  | 18585056 | 000005F | quiver | Chr4 |
| 666402   | 1458787  | 11754866 | 12547283 | 792386  | 792418  | 99.99 | 7496166  | 18585056 | 000005F | quiver | Chr4 |
| 1438787  | 3138046  | 12527275 | 14226523 | 1699260 | 1699249 | 99.99 | 7496166  | 18585056 | 000005F | quiver | Chr4 |
| 3118040  | 7496166  | 14206543 | 18584640 | 4378127 | 4378098 | 99.99 | 7496166  | 18585056 | 000005F | quiver | Chr4 |
| 1        | 900838   | 5724     | 906564   | 900838  | 900841  | 99.99 | 11244802 | 26975502 | 000001F | quiver | Chr5 |
| 880806   | 965858   | 886537   | 971581   | 85053   | 85045   | 99.98 | 11244802 | 26975502 | 000001F | quiver | Chr5 |
| 966561   | 2605361  | 971392   | 2610123  | 1638801 | 1638732 | 99.99 | 11244802 | 26975502 | 000001F | quiver | Chr5 |
| 2606398  | 3368473  | 2610118  | 3372196  | 762076  | 762079  | 99.99 | 11244802 | 26975502 | 000001F | quiver | Chr5 |
| 3369147  | 4000850  | 3372146  | 4003846  | 631704  | 631701  | 99.99 | 11244802 | 26975502 | 000001F | quiver | Chr5 |
| 4006891  | 5780360  | 4002894  | 5776363  | 1773470 | 1773470 | 99.99 | 11244802 | 26975502 | 000001F | quiver | Chr5 |
| 5778356  | 7878819  | 5776359  | 7876830  | 2100464 | 2100472 | 99.99 | 11244802 | 26975502 | 000001F | quiver | Chr5 |
| 7879158  | 9664524  | 7876822  | 9662202  | 1785367 | 1785381 | 99.99 | 11244802 | 26975502 | 000001F | quiver | Chr5 |
| 9644524  | 11050293 | 9642208  | 11047996 | 1405770 | 1405789 | 99.99 | 11244802 | 26975502 | 000001F | quiver | Chr5 |
| 11030278 | 11186821 | 11027971 | 11184521 | 156544  | 156551  | 99.99 | 11244802 | 26975502 | 000001F | quiver | Chr5 |
| 13085    | 407947   | 11662555 | 11267687 | 394863  | 394869  | 99.99 | 407947   | 26975502 | 000029F | quiver | Chr5 |
| 1        | 13040    | 11675590 | 11662551 | 13040   | 13040   | 99.98 | 407947   | 26975502 | 000029F | quiver | Chr5 |
| 1        | 46415    | 11733135 | 11779522 | 46415   | 46388   | 99.81 | 52259    | 26975502 | 000044F | quiver | Chr5 |
| 1        | 14443    | 11801133 | 11786699 | 14443   | 14435   | 99.59 | 14443    | 26975502 | 000069F | quiver | Chr5 |
| 1        | 10887    | 11810723 | 11821602 | 10887   | 10880   | 99.25 | 15739    | 26975502 | 000075F | quiver | Chr5 |
| 1        | 23423    | 11927266 | 11903841 | 23423   | 23426   | 99.97 | 23423    | 26975502 | 000057F | quiver | Chr5 |
| 241804   | 286274   | 11990458 | 11945965 | 44471   | 44494   | 98.82 | 288146   | 26975502 | 000031F | quiver | Chr5 |
| 1        | 661249   | 12049413 | 12710659 | 661249  | 661247  | 99.99 | 780821   | 26975502 | 000024F | quiver | Chr5 |
| 662148   | 779150   | 12710436 | 12827448 | 117003  | 117013  | 99.99 | 780821   | 26975502 | 000024F | quiver | Chr5 |
| 758917   | 780821   | 12849930 | 12871838 | 21905   | 21909   | 98.01 | 780821   | 26975502 | 000024F | quiver | Chr5 |
| 1        | 274108   | 12891085 | 13165189 | 274108  | 274105  | 99.99 | 1440677  | 26975502 | 000016F | quiver | Chr5 |
| 254056   | 313092   | 13145143 | 13204170 | 59037   | 59028   | 99.91 | 1440677  | 26975502 | 000016F | quiver | Chr5 |
| 306241   | 545869   | 13195371 | 13435011 | 239629  | 239641  | 99.89 | 1440677  | 26975502 | 000016F | quiver | Chr5 |
| 545953   | 561070   | 13434417 | 13449555 | 15118   | 15139   | 95.38 | 1440677  | 26975502 | 000016F | quiver | Chr5 |
| 566394   | 1273916  | 13450628 | 14158161 | 707523  | 707534  | 99.87 | 1440677  | 26975502 | 000016F | quiver | Chr5 |

|         |         |          |          |         |         |       |         |          |                |      |
|---------|---------|----------|----------|---------|---------|-------|---------|----------|----------------|------|
| 1274087 | 1440677 | 14158135 | 14324731 | 166591  | 166597  | 99.99 | 1440677 | 26975502 | 000016F quiver | Chr5 |
| 5646    | 605659  | 14449557 | 15049574 | 600014  | 600018  | 99.97 | 1226169 | 26975502 | 000021F quiver | Chr5 |
| 585639  | 1226169 | 15029547 | 15670079 | 640531  | 640533  | 99.99 | 1226169 | 26975502 | 000021F quiver | Chr5 |
| 1       | 103675  | 15697254 | 15800919 | 103675  | 103666  | 99.99 | 2448551 | 26975502 | 000013F quiver | Chr5 |
| 83678   | 706634  | 15780930 | 16403876 | 622957  | 622947  | 99.93 | 2448551 | 26975502 | 000013F quiver | Chr5 |
| 703088  | 2166278 | 16395164 | 17858350 | 1463191 | 1463187 | 99.99 | 2448551 | 26975502 | 000013F quiver | Chr5 |
| 2146303 | 2433457 | 17838408 | 18125530 | 287155  | 287123  | 99.99 | 2448551 | 26975502 | 000013F quiver | Chr5 |
| 8626061 | 8822328 | 18321767 | 18125491 | 196268  | 196277  | 99.99 | 8822328 | 26975502 | 000003F quiver | Chr5 |
| 7364932 | 8646164 | 19582912 | 18301658 | 1281233 | 1281255 | 99.99 | 8822328 | 26975502 | 000003F quiver | Chr5 |
| 6411554 | 7384953 | 20536290 | 19562883 | 973400  | 973408  | 99.99 | 8822328 | 26975502 | 000003F quiver | Chr5 |
| 6350358 | 6431550 | 20597484 | 20516307 | 81193   | 81178   | 99.98 | 8822328 | 26975502 | 000003F quiver | Chr5 |
| 5660420 | 6383700 | 21320768 | 20597484 | 723281  | 723285  | 99.98 | 8822328 | 26975502 | 000003F quiver | Chr5 |
| 4714343 | 5655718 | 22258333 | 21316985 | 941376  | 941349  | 99.99 | 8822328 | 26975502 | 000003F quiver | Chr5 |
| 2949713 | 4734327 | 24022974 | 22238383 | 1784615 | 1784592 | 99.99 | 8822328 | 26975502 | 000003F quiver | Chr5 |
| 1       | 2949385 | 26972228 | 24022834 | 2949385 | 2949395 | 99.99 | 8822328 | 26975502 | 000003F quiver | Chr5 |

## dnadiff output

|                     | [REF]             | [QRY]             |
|---------------------|-------------------|-------------------|
| [Sequences]         |                   |                   |
| TotalSeqs           | 377               | 7                 |
| AlignedSeqs         | 60(15.92%)        | 7(100.00%)        |
| UnalignedSeqs       | 317(84.08%)       | 0(0.00%)          |
| [Bases]             |                   |                   |
| TotalBases          | 119959929         | 119667750         |
| AlignedBases        | 117215989(97.71%) | 117131679(97.88%) |
| UnalignedBases      | 2743940(2.29%)    | 2536071(2.12%)    |
| [Alignments]        |                   |                   |
| 1-to-1              | 239               | 239               |
| TotalLength         | 118258577         | 118259429         |
| AvgLength           | 494805.76         | 494809.33         |
| AvgIdentity         | 99.98             | 99.98             |
| M-to-M              | 239               | 239               |
| TotalLength         | 118258577         | 118259429         |
| AvgLength           | 494805.76         | 494809.33         |
| AvgIdentity         | 99.98             | 99.98             |
| [Feature Estimates] |                   |                   |
| Breakpoints         | 396               | 475               |
| Relocations         | 6                 | 6                 |
| Translocations      | 4                 | 62                |
| Inversions          | 4                 | 2                 |
| Insertions          | 154               | 122               |
| InsertionSum        | 668258            | 2633180           |
| InsertionAvg        | 4339.34           | 21583.44          |

|              |         |         |
|--------------|---------|---------|
| TandemIns    | 37      | 34      |
| TandemInsSum | 47812   | 63943   |
| TandemInsAvg | 1292.22 | 1880.68 |

[SNPs]

|           |             |             |
|-----------|-------------|-------------|
| TotalSNPs | 5860        | 5860        |
| AT        | 577(9.85%)  | 545(9.30%)  |
| AC        | 350(5.97%)  | 319(5.44%)  |
| AG        | 652(11.13%) | 779(13.29%) |
| TA        | 545(9.30%)  | 577(9.85%)  |
| TC        | 615(10.49%) | 747(12.75%) |
| TG        | 410(7.00%)  | 412(7.03%)  |
| CA        | 319(5.44%)  | 350(5.97%)  |
| CT        | 747(12.75%) | 615(10.49%) |
| CG        | 237(4.04%)  | 217(3.70%)  |
| GA        | 779(13.29%) | 652(11.13%) |
| GT        | 412(7.03%)  | 410(7.00%)  |
| GC        | 217(3.70%)  | 237(4.04%)  |

|            |             |             |
|------------|-------------|-------------|
| TotalGSNPs | 1424        | 1424        |
| AT         | 122(8.57%)  | 121(8.50%)  |
| AC         | 94(6.60%)   | 80(5.62%)   |
| AG         | 135(9.48%)  | 222(15.59%) |
| TA         | 121(8.50%)  | 122(8.57%)  |
| TC         | 150(10.53%) | 188(13.20%) |
| TG         | 114(8.01%)  | 100(7.02%)  |
| CA         | 80(5.62%)   | 94(6.60%)   |
| CT         | 188(13.20%) | 150(10.53%) |
| CG         | 57(4.00%)   | 41(2.88%)   |
| GA         | 222(15.59%) | 135(9.48%)  |
| GT         | 100(7.02%)  | 114(8.01%)  |
| GC         | 41(2.88%)   | 57(4.00%)   |

|             |              |              |
|-------------|--------------|--------------|
| TotalIndels | 6896         | 6896         |
| H.          | 0(0.00%)     | 1(0.01%)     |
| A.          | 1042(15.11%) | 1568(22.74%) |
| T.          | 1041(15.10%) | 1532(22.22%) |
| C.          | 419(6.08%)   | 389(5.64%)   |
| G.          | 427(6.19%)   | 477(6.92%)   |
| .H          | 1(0.01%)     | 0(0.00%)     |
| .A          | 1568(22.74%) | 1042(15.11%) |
| .T          | 1532(22.22%) | 1041(15.10%) |

|              |             |             |
|--------------|-------------|-------------|
| .C           | 389(5.64%)  | 419(6.08%)  |
| .G           | 477(6.92%)  | 427(6.19%)  |
| TotalGIndels | 3386        | 3386        |
| H.           | 0(0.00%)    | 1(0.03%)    |
| A.           | 471(13.91%) | 940(27.76%) |
| T.           | 475(14.03%) | 888(26.23%) |
| C.           | 154(4.55%)  | 131(3.87%)  |
| G.           | 166(4.90%)  | 160(4.73%)  |
| .H           | 1(0.03%)    | 0(0.00%)    |
| .A           | 940(27.76%) | 471(13.91%) |
| .T           | 888(26.23%) | 475(14.03%) |
| .C           | 131(3.87%)  | 154(4.55%)  |
| .G           | 160(4.73%)  | 166(4.90%)  |



Supplementary Table 3: BUSCO results for all assemblies

|                                                        | Complete<br>Single-Copy<br>BUSCOs | Complete<br>Phased<br>BUSCOs | Fragmented<br>BUSCOs | Missing<br>BUSCOs | Total BUSCO<br>groups<br>searched |
|--------------------------------------------------------|-----------------------------------|------------------------------|----------------------|-------------------|-----------------------------------|
| TAIR10                                                 | 915                               | 149                          | 13                   | 28                | 956                               |
| (%)                                                    | 96%                               | 16%                          | 1%                   | 3%                |                                   |
| Col-0 Assembly (FALCON)                                | 914                               | 153                          | 10                   | 32                | 956                               |
| (%)                                                    | 96%                               | 16%                          | 1%                   | 3%                |                                   |
| Cvi-0 Assembly (FALCON)                                | 909                               | 151                          | 12                   | 35                | 956                               |
| (%)                                                    | 95%                               | 16%                          | 1%                   | 4%                |                                   |
| Col-0 x Cvi-0 F1 Assembly (FALCON + FALCON-Unzip)      | 906                               | 877                          | 11                   | 39                | 956                               |
| (%)                                                    | 95%                               | 92%                          | 1%                   | 4%                |                                   |
| Col-0 x Cvi-0 F1 Assembly (Platanus)                   | 895                               | 150                          | 21                   | 40                | 956                               |
| (%)                                                    | 94%                               | 16%                          | 2%                   | 4%                |                                   |
| Col-0 x Cvi-0 F1 Assembly (SOAPdenovo, k=93)           | 524                               | 91                           | 147                  | 285               | 956                               |
| (%)                                                    | 55%                               | 10%                          | 15%                  | 30%               |                                   |
| Cabernet Sauvignon assembly (FALCON + FALCON-Unzip)    | 894                               | 766                          | 23                   | 39                | 956                               |
| (%)                                                    | 94%                               | 80%                          | 2%                   | 4%                |                                   |
| Cabernet Sauvignon assembly (SOAPdenovo, k=33)         | 123                               | 8                            | 138                  | 659               | 956                               |
| (%)                                                    | 13%                               | 1%                           | 14%                  | 69%               |                                   |
| Cabernet Sauvignon assembly (SOAPdenovo, k=43)         | 52                                | 5                            | 97                   | 807               | 956                               |
| (%)                                                    | 5%                                | 1%                           | 10%                  | 84%               |                                   |
| Clavicornona pyxidata assembly (FALCON + FALCON-Unzip) | 366                               | 277                          | 33                   | 30                | 429                               |
| (%)                                                    | 85%                               | 65%                          | 8%                   | 7%                |                                   |
| Clavicornona pyxidata assembly (Platanus)              | 365                               | 29                           | 35                   | 29                | 429                               |
| (%)                                                    | 85%                               | 7%                           | 8%                   | 7%                |                                   |
| Clavicornona pyxidata assembly (SOAPdenovo, k=19)      | 15                                | 2                            | 92                   | 322               | 429                               |
| (%)                                                    | 3%                                | 0%                           | 21%                  | 75%               |                                   |

Supplementary Table 4. Comparison of structural variation calls of F1 long and short read assemblies to TAIR10

|                                    | Size range    | Falcon Unzip<br>(long reads) |           | Platanus<br>(short reads) |          | SOAPdenovo<br>(short reads) |          |
|------------------------------------|---------------|------------------------------|-----------|---------------------------|----------|-----------------------------|----------|
|                                    |               | Count                        | Total bp  | Count                     | Total bp | Count                       | Total bp |
| Insertion                          | 1-9 bp        | 85,223                       | 177,966   | 38,280                    | 80,577   | 1,165                       | 1,405    |
|                                    | 10-49 bp      | 7,319                        | 132,311   | 3,293                     | 59,094   | 6                           | 131      |
|                                    | 50-499 bp     | 856                          | 143,041   | 352                       | 50,044   | 1                           | 107      |
|                                    | 500-10,000 bp | 239                          | 174,575   | 44                        | 30,627   | 0                           | 0        |
|                                    | Total         | 93,637                       | 627,893   | 41,969                    | 220,342  | 1,172                       | 1,643    |
| Deletion                           | 1-9 bp        | 111,741                      | 209,765   | 39,673                    | 84,890   | 1,201                       | 1,669    |
|                                    | 10-49 bp      | 7,352                        | 132,172   | 3,423                     | 58,610   | 32                          | 612      |
|                                    | 50-499 bp     | 860                          | 146,067   | 255                       | 41,402   | 6                           | 434      |
|                                    | 500-10,000 bp | 243                          | 173,339   | 62                        | 44,010   | 0                           | 0        |
|                                    | Total         | 120,196                      | 661,343   | 43,413                    | 228,912  | 1,239                       | 2,715    |
| Tandem expansion                   | 1-9 bp        | 10                           | 63        | 0                         | 0        | 0                           | 0        |
|                                    | 10-49 bp      | 4                            | 115       | 0                         | 0        | 0                           | 0        |
|                                    | 50-499 bp     | 95                           | 20,285    | 12                        | 2,170    | 2                           | 461      |
|                                    | 500-10,000 bp | 33                           | 23,974    | 1                         | 849      | 0                           | 0        |
|                                    | Total         | 142                          | 44,437    | 13                        | 3,019    | 2                           | 461      |
| Tandem contraction                 | 1-9 bp        | 3                            | 19        | 1                         | 6        | 0                           | 0        |
|                                    | 10-49 bp      | 13                           | 362       | 4                         | 173      | 0                           | 0        |
|                                    | 50-499 bp     | 72                           | 12,972    | 31                        | 5,026    | 0                           | 0        |
|                                    | 500-10,000 bp | 14                           | 9,392     | 5                         | 3,703    | 0                           | 0        |
|                                    | Total         | 102                          | 22,745    | 41                        | 8,908    | 0                           | 0        |
| Repeat expansion                   | 1-9 bp        | 42                           | 215       | 13                        | 72       | 0                           | 0        |
|                                    | 10-49 bp      | 107                          | 3,122     | 37                        | 1,097    | 0                           | 0        |
|                                    | 50-499 bp     | 480                          | 98,978    | 133                       | 27,657   | 1                           | 356      |
|                                    | 500-10,000 bp | 223                          | 160,197   | 48                        | 34,068   | 0                           | 0        |
|                                    | Total         | 852                          | 262,512   | 231                       | 62,894   | 1                           | 356      |
| Repeat contraction                 | 1-9 bp        | 36                           | 180       | 12                        | 74       | 0                           | 0        |
|                                    | 10-49 bp      | 104                          | 2,752     | 35                        | 982      | 0                           | 0        |
|                                    | 50-499 bp     | 500                          | 109,907   | 128                       | 27,847   | 0                           | 0        |
|                                    | 500-10,000 bp | 232                          | 167,932   | 57                        | 38,981   | 0                           | 0        |
|                                    | Total         | 872                          | 280,771   | 232                       | 67,884   | 0                           | 0        |
| Total variants                     |               | 215,801                      | 1,899,701 | 85,899                    | 591,959  | 2,414                       | 5,175    |
| Total structural variants (>50 bp) |               | 3,847                        | 1,240,659 | 1,128                     | 306,384  | 10                          | 1,358    |

Counts and numbers of base-pairs affected for all variants called using Assemblytics on three Arabidopsis F1 assemblies created using Falcon Unzip, Platanus, and SOAPdenovo.

Supplementary Table 5. Haplotig SNP rate against two parental inbred lines

| Haplotig           | Haplotig Length | Cvi-0 SNP count | Col-0 SNP count | Total SNP count | Minority SNP Percent |
|--------------------|-----------------|-----------------|-----------------|-----------------|----------------------|
| 00002F_048 quiver  | 11648134        | 51332           | 67              | 51399           | 0.13%                |
| 000001F_020 quiver | 10223221        | 71              | 46926           | 46997           | 0.15%                |
| 000003F_043 quiver | 8549752         | 40239           | 9               | 40248           | 0.02%                |
| 000004F_017 quiver | 8151251         | 39237           | 42              | 39279           | 0.11%                |
| 000007F_009 quiver | 7363020         | 20              | 31712           | 31732           | 0.06%                |
| 000006F_002 quiver | 6920133         | 36              | 28565           | 28601           | 0.13%                |
| 000000F_023 quiver | 4980446         | 17666           | 23              | 17689           | 0.13%                |
| 000005F_002 quiver | 4634947         | 20290           | 21              | 20311           | 0.10%                |
| 000000F_067 quiver | 4264247         | 58              | 20338           | 20396           | 0.28%                |
| 000003F_003 quiver | 2951262         | 22              | 14508           | 14530           | 0.15%                |
| 000008F_024 quiver | 2474970         | 4               | 11107           | 11111           | 0.04%                |
| 000000F_024 quiver | 2269985         | 0               | 11999           | 11999           | 0.00%                |
| 000012F_008 quiver | 1915216         | 5918            | 2235            | 8153            | 27.41%               |
| 000010F_015 quiver | 1907498         | 7617            | 55              | 7672            | 0.72%                |
| 000009F_003 quiver | 1756424         | 7098            | 18              | 7116            | 0.25%                |
| 000005F_014 quiver | 1549736         | 0               | 5796            | 5796            | 0.00%                |
| 000014F_001 quiver | 1441662         | 1               | 6361            | 6362            | 0.02%                |
| 000011F_019 quiver | 1195815         | 5849            | 79              | 5928            | 1.33%                |
| 000011F_001 quiver | 1185774         | 5301            | 60              | 5361            | 1.12%                |
| 000017F_001 quiver | 1037616         | 37              | 4841            | 4878            | 0.76%                |
| 000008F_013 quiver | 1023039         | 13              | 4165            | 4178            | 0.31%                |
| 000006F_022 quiver | 999021          | 3702            | 12              | 3714            | 0.32%                |
| 000001F_014 quiver | 967088          | 37              | 4054            | 4091            | 0.90%                |
| 000021F_001 quiver | 888598          | 1               | 3462            | 3463            | 0.03%                |
| 000009F_010 quiver | 857101          | 3690            | 14              | 3704            | 0.38%                |
| 000028F_001 quiver | 819332          | 4484            | 0               | 4484            | 0.00%                |
| 000016F_001 quiver | 815207          | 198             | 3361            | 3559            | 5.56%                |
| 000000F_048 quiver | 791525          | 3               | 4396            | 4399            | 0.07%                |
| 000008F_030 quiver | 597307          | 10              | 1201            | 1211            | 0.83%                |
| 000029F_001 quiver | 571770          | 2               | 2152            | 2154            | 0.09%                |
| 000036F_001 quiver | 556366          | 2082            | 179             | 2261            | 7.92%                |
| 000008F_028 quiver | 471244          | 1880            | 26              | 1906            | 1.36%                |
| 000018F_006 quiver | 468656          | 0               | 2387            | 2387            | 0.00%                |
| 000004F_013 quiver | 424432          | 1               | 1388            | 1389            | 0.07%                |
| 000047F_001 quiver | 389013          | 2101            | 588             | 2689            | 21.87%               |
| 000009F_005 quiver | 350100          | 1624            | 1               | 1625            | 0.06%                |
| 000000F_008 quiver | 328329          | 1676            | 5               | 1681            | 0.30%                |
| 000005F_021 quiver | 317751          | 2               | 2099            | 2101            | 0.10%                |
| 000010F_013 quiver | 267325          | 1314            | 49              | 1363            | 3.60%                |
| 000013F_003 quiver | 254323          | 2               | 649             | 651             | 0.31%                |
| 000019F_001 quiver | 244975          | 32              | 866             | 898             | 3.56%                |
| 000000F_029 quiver | 235982          | 477             | 3               | 480             | 0.63%                |
| 000015F_004 quiver | 222960          | 1357            | 1               | 1358            | 0.07%                |
| 000014F_008 quiver | 215295          | 0               | 899             | 899             | 0.00%                |
| 000018F_005 quiver | 149807          | 0               | 817             | 817             | 0.00%                |
| 000010F_002 quiver | 142762          | 0               | 308             | 308             | 0.00%                |
| 000018F_003 quiver | 132892          | 596             | 4               | 600             | 0.67%                |
| 000010F_009 quiver | 124749          | 648             | 0               | 648             | 0.00%                |
| 000032F_001 quiver | 109741          | 4               | 357             | 361             | 1.11%                |
| 000036F_006 quiver | 98869           | 46              | 0               | 46              | 0.00%                |
| 000026F_005 quiver | 96326           | 159             | 0               | 159             | 0.00%                |
| 000002F_053 quiver | 81554           | 4               | 0               | 4               | 0.00%                |
| 000082F_001 quiver | 74889           | 217             | 13              | 230             | 5.65%                |
| 000051F_001 quiver | 69253           | 2102            | 0               | 2102            | 0.00%                |

|                    |       |     |     |     |        |
|--------------------|-------|-----|-----|-----|--------|
| 000009F_009 quiver | 62928 | 309 | 1   | 310 | 0.32%  |
| 000008F_022 quiver | 62415 | 0   | 82  | 82  | 0.00%  |
| 000107F_001 quiver | 60667 | 17  | 2   | 19  | 10.53% |
| 000026F_006 quiver | 56116 | 1   | 0   | 1   | 0.00%  |
| 000000F_053 quiver | 55481 | 17  | 434 | 451 | 3.77%  |
| 000143F_001 quiver | 47951 | 0   | 25  | 25  | 0.00%  |
| 000040F_001 quiver | 43707 | 222 | 1   | 223 | 0.45%  |
| 000053F_001 quiver | 43417 | 55  | 0   | 55  | 0.00%  |
| 000050F_001 quiver | 42565 | 0   | 186 | 186 | 0.00%  |
| 000097F_001 quiver | 42449 | 0   | 386 | 386 | 0.00%  |
| 000009F_018 quiver | 41320 | 4   | 153 | 157 | 2.55%  |
| 000026F_002 quiver | 41157 | 1   | 0   | 1   | 0.00%  |
| 000009F_017 quiver | 40786 | 90  | 0   | 90  | 0.00%  |
| 000011F_018 quiver | 40469 | 1   | 0   | 1   | 0.00%  |
| 000026F_001 quiver | 38716 | 23  | 0   | 23  | 0.00%  |
| 000015F_005 quiver | 38585 | 0   | 1   | 1   | 0.00%  |
| 000013F_004 quiver | 37531 | 4   | 111 | 115 | 3.48%  |
| 000000F_001 quiver | 37300 | 285 | 19  | 304 | 6.25%  |
| 000044F_001 quiver | 33412 | 155 | 7   | 162 | 4.32%  |
| 000010F_007 quiver | 33020 | 146 | 19  | 165 | 11.52% |
| 000012F_004 quiver | 32961 | 81  | 0   | 81  | 0.00%  |
| 000015F_001 quiver | 32675 | 1   | 170 | 171 | 0.58%  |
| 000003F_051 quiver | 31417 | 55  | 0   | 55  | 0.00%  |
| 000056F_001 quiver | 30771 | 807 | 0   | 807 | 0.00%  |
| 000011F_008 quiver | 30548 | 194 | 0   | 194 | 0.00%  |
| 000010F_012 quiver | 29282 | 197 | 1   | 198 | 0.51%  |
| 000018F_004 quiver | 28808 | 280 | 2   | 282 | 0.71%  |
| 000005F_013 quiver | 26271 | 37  | 19  | 56  | 33.93% |
| 000066F_001 quiver | 25194 | 23  | 202 | 225 | 10.22% |
| 000189F_001 quiver | 22194 | 17  | 2   | 19  | 10.53% |
| 000143F_002 quiver | 22091 | 0   | 34  | 34  | 0.00%  |
| 000109F_001 quiver | 21623 | 155 | 105 | 260 | 40.38% |
| 000031F_002 quiver | 21378 | 0   | 1   | 1   | 0.00%  |
| 000046F_001 quiver | 20553 | 0   | 2   | 2   | 0.00%  |
| 000033F_002 quiver | 20195 | 1   | 157 | 158 | 0.63%  |
| 000017F_004 quiver | 18591 | 0   | 117 | 117 | 0.00%  |
| 000001F_018 quiver | 18157 | 12  | 0   | 12  | 0.00%  |
| 000058F_002 quiver | 16353 | 64  | 18  | 82  | 21.95% |
| 000002F_059 quiver | 16172 | 53  | 0   | 53  | 0.00%  |

Supplementary Table 6. Haplotig concordance against two parental inbred lines

| Haplotig           | Haplotig Length | SNP vs Cvi-0 | SNP vs Col-0 | DEL vs Cvi-0 | DEL vs Col-0 | INS vs Cvi-0 | INS vs Col-0 | estimated SNP concordance(phred scale) | estimated indel concordance(phred scale) |
|--------------------|-----------------|--------------|--------------|--------------|--------------|--------------|--------------|----------------------------------------|------------------------------------------|
| 000002F_048 quiver | 11648134        | 51332        | 67           | 25268        | 1284         | 25707        | 523          | 52                                     | 38                                       |
| 000001F_020 quiver | 10223221        | 71           | 46926        | 1004         | 23012        | 602          | 22127        | 52                                     | 38                                       |
| 000003F_043 quiver | 8549752         | 40239        | 9            | 18984        | 782          | 19860        | 250          | 59                                     | 39                                       |
| 000004F_017 quiver | 8151251         | 39237        | 42           | 18298        | 687          | 18002        | 364          | 53                                     | 39                                       |
| 000007F_009 quiver | 7363020         | 20           | 31712        | 641          | 16191        | 438          | 15110        | 55                                     | 38                                       |
| 000006F_002 quiver | 6920133         | 36           | 28565        | 432          | 14184        | 310          | 13666        | 53                                     | 40                                       |
| 000000F_023 quiver | 4980446         | 17666        | 23           | 9265         | 370          | 9679         | 145          | 53                                     | 40                                       |
| 000005F_002 quiver | 4634947         | 20290        | 21           | 9359         | 452          | 10130        | 196          | 53                                     | 39                                       |
| 000000F_067 quiver | 4264247         | 58           | 20338        | 672          | 8340         | 379          | 7943         | 49                                     | 36                                       |
| 000003F_003 quiver | 2951262         | 22           | 14508        | 312          | 6542         | 184          | 5697         | 51                                     | 38                                       |
| 000008F_024 quiver | 2474970         | 4            | 11107        | 197          | 4503         | 93           | 4741         | 57                                     | 39                                       |
| 000000F_024 quiver | 2269985         | 0            | 11999        | 127          | 5673         | 107          | 5483         | 64                                     | 40                                       |
| 000012F_008 quiver | 1915216         | 5918         | 2235         | 2438         | 1283         | 2518         | 803          | 29                                     | 30                                       |
| 000010F_015 quiver | 1907498         | 7617         | 55           | 3102         | 283          | 2675         | 91           | 45                                     | 37                                       |
| 000009F_003 quiver | 1756424         | 7098         | 18           | 3049         | 269          | 3084         | 41           | 50                                     | 38                                       |
| 000005F_014 quiver | 1549736         | 0            | 5796         | 56           | 3054         | 65           | 2716         | 62                                     | 41                                       |
| 000014F_001 quiver | 1441662         | 1            | 6361         | 80           | 2768         | 75           | 3135         | 59                                     | 40                                       |
| 000011F_019 quiver | 1195815         | 5849         | 79           | 1857         | 308          | 1592         | 62           | 42                                     | 35                                       |
| 000011F_001 quiver | 1185774         | 5301         | 60           | 2219         | 332          | 2489         | 121          | 43                                     | 34                                       |
| 000017F_001 quiver | 1037616         | 37           | 4841         | 140          | 1233         | 51           | 1211         | 44                                     | 37                                       |
| 000008F_013 quiver | 1023039         | 13           | 4165         | 304          | 1207         | 72           | 1251         | 49                                     | 34                                       |
| 000006F_022 quiver | 999021          | 3702         | 12           | 1947         | 115          | 2204         | 50           | 49                                     | 38                                       |
| 000001F_014 quiver | 967088          | 37           | 4054         | 383          | 1711         | 67           | 1531         | 44                                     | 33                                       |
| 000021F_001 quiver | 888598          | 1            | 3462         | 85           | 1126         | 23           | 929          | 56                                     | 39                                       |
| 000009F_010 quiver | 857101          | 3690         | 14           | 1564         | 154          | 1755         | 26           | 48                                     | 37                                       |
| 000028F_001 quiver | 819332          | 4484         | 0            | 2035         | 42           | 2060         | 17           | 59                                     | 41                                       |
| 000016F_001 quiver | 815207          | 198          | 3361         | 239          | 1418         | 111          | 1387         | 36                                     | 34                                       |
| 000000F_048 quiver | 791525          | 3            | 4396         | 44           | 1934         | 50           | 1945         | 53                                     | 39                                       |
| 000008F_030 quiver | 597307          | 10           | 1201         | 127          | 577          | 39           | 515          | 47                                     | 36                                       |
| 000029F_001 quiver | 571770          | 2            | 2152         | 63           | 966          | 41           | 771          | 53                                     | 37                                       |
| 000036F_001 quiver | 556366          | 2082         | 179          | 496          | 282          | 511          | 237          | 35                                     | 30                                       |
| 000008F_028 quiver | 471244          | 1880         | 26           | 904          | 227          | 835          | 59           | 42                                     | 32                                       |
| 000018F_006 quiver | 468656          | 0            | 2387         | 21           | 1004         | 15           | 1234         | 57                                     | 41                                       |
| 000004F_013 quiver | 424432          | 1            | 1388         | 68           | 770          | 23           | 695          | 53                                     | 37                                       |
| 000047F_001 quiver | 389013          | 2101         | 588          | 478          | 72           | 431          | 174          | 28                                     | 32                                       |
| 000009F_005 quiver | 350100          | 1624         | 1            | 599          | 70           | 418          | 8            | 52                                     | 36                                       |
| 000000F_008 quiver | 328329          | 1676         | 5            | 739          | 77           | 522          | 14           | 47                                     | 36                                       |
| 000005F_021 quiver | 317751          | 2            | 2099         | 71           | 676          | 34           | 735          | 50                                     | 35                                       |
| 000010F_013 quiver | 267325          | 1314         | 49           | 423          | 55           | 640          | 11           | 37                                     | 36                                       |
| 000013F_003 quiver | 254323          | 2            | 649          | 53           | 208          | 16           | 215          | 49                                     | 36                                       |
| 000019F_001 quiver | 244975          | 32           | 866          | 85           | 213          | 17           | 374          | 39                                     | 34                                       |
| 000000F_029 quiver | 235982          | 477          | 3            | 185          | 88           | 206          | 10           | 48                                     | 34                                       |
| 000015F_004 quiver | 222960          | 1357         | 1            | 347          | 46           | 246          | 13           | 50                                     | 36                                       |
| 000014F_008 quiver | 215295          | 0            | 899          | 12           | 399          | 7            | 172          | 53                                     | 40                                       |
| 000018F_005 quiver | 149807          | 0            | 817          | 13           | 327          | 5            | 323          | 52                                     | 39                                       |
| 000010F_002 quiver | 142762          | 0            | 308          | 30           | 83           | 11           | 46           | 52                                     | 35                                       |
| 000018F_003 quiver | 132892          | 596          | 4            | 223          | 47           | 243          | 17           | 44                                     | 33                                       |
| 000010F_009 quiver | 124749          | 648          | 0            | 143          | 15           | 170          | 0            | 51                                     | 39                                       |
| 000032F_001 quiver | 109741          | 4            | 357          | 58           | 68           | 4            | 164          | 43                                     | 32                                       |
| 000036F_006 quiver | 98869           | 46           | 0            | 75           | 0            | 18           | 0            | 50                                     | 50                                       |
| 000026F_005 quiver | 96326           | 159          | 0            | 54           | 0            | 86           | 0            | 50                                     | 50                                       |
| 000002F_053 quiver | 81554           | 4            | 0            | 37           | 0            | 6            | 0            | 49                                     | 49                                       |
| 000082F_001 quiver | 74889           | 217          | 13           | 62           | 14           | 52           | 19           | 37                                     | 33                                       |
| 000051F_001 quiver | 69253           | 2102         | 0            | 290          | 2            | 69           | 0            | 48                                     | 44                                       |
| 000009F_009 quiver | 62928           | 309          | 1            | 212          | 66           | 191          | 5            | 45                                     | 29                                       |
| 000008F_022 quiver | 62415           | 0            | 82           | 0            | 65           | 0            | 77           | 48                                     | 48                                       |
| 000107F_001 quiver | 60667           | 17           | 2            | 19           | 19           | 6            | 3            | 43                                     | 34                                       |
| 000026F_006 quiver | 56116           | 1            | 0            | 69           | 0            | 34           | 0            | 47                                     | 47                                       |
| 000000F_053 quiver | 55481           | 17           | 434          | 26           | 119          | 14           | 144          | 35                                     | 31                                       |

|                    |       |     |     |     |     |     |     |    |    |
|--------------------|-------|-----|-----|-----|-----|-----|-----|----|----|
| 000143F_001 quiver | 47951 | 0   | 25  | 0   | 98  | 0   | 164 | 47 | 47 |
| 000007F_004 quiver | 47307 | 0   | 0   | 0   | 1   | 0   | 0   | 47 | 47 |
| 000040F_001 quiver | 43707 | 222 | 1   | 97  | 58  | 83  | 11  | 43 | 28 |
| 000053F_001 quiver | 43417 | 55  | 0   | 198 | 0   | 53  | 0   | 46 | 46 |
| 000050F_001 quiver | 42565 | 0   | 186 | 0   | 97  | 0   | 63  | 46 | 46 |
| 000097F_001 quiver | 42449 | 0   | 386 | 0   | 137 | 0   | 78  | 46 | 46 |
| 000014F_006 quiver | 41387 | 0   | 0   | 0   | 57  | 0   | 14  | 46 | 46 |
| 000009F_018 quiver | 41320 | 4   | 153 | 34  | 54  | 18  | 35  | 39 | 29 |
| 000026F_002 quiver | 41157 | 1   | 0   | 33  | 0   | 26  | 0   | 46 | 46 |
| 000009F_017 quiver | 40786 | 90  | 0   | 14  | 11  | 26  | 1   | 46 | 35 |
| 000011F_018 quiver | 40469 | 1   | 0   | 1   | 16  | 0   | 2   | 46 | 43 |
| 000026F_001 quiver | 38716 | 23  | 0   | 33  | 0   | 43  | 0   | 46 | 46 |
| 000015F_005 quiver | 38585 | 0   | 1   | 0   | 48  | 0   | 9   | 46 | 46 |
| 000013F_004 quiver | 37531 | 4   | 111 | 16  | 33  | 8   | 8   | 39 | 32 |
| 000006F_030 quiver | 37337 | 0   | 0   | 0   | 2   | 0   | 1   | 46 | 46 |
| 000000F_001 quiver | 37300 | 285 | 19  | 138 | 58  | 141 | 16  | 33 | 27 |
| 000014F_004 quiver | 35424 | 0   | 0   | 0   | 8   | 0   | 3   | 45 | 45 |
| 000044F_001 quiver | 33412 | 155 | 7   | 49  | 37  | 35  | 11  | 36 | 28 |
| 000010F_007 quiver | 33020 | 146 | 19  | 106 | 73  | 12  | 4   | 32 | 26 |
| 000012F_004 quiver | 32961 | 81  | 0   | 103 | 0   | 33  | 0   | 45 | 45 |
| 000015F_001 quiver | 32675 | 1   | 170 | 31  | 28  | 7   | 74  | 42 | 30 |
| 000003F_051 quiver | 31417 | 55  | 0   | 34  | 0   | 6   | 0   | 45 | 45 |
| 000056F_001 quiver | 30771 | 807 | 0   | 236 | 0   | 64  | 0   | 45 | 45 |
| 000011F_008 quiver | 30548 | 194 | 0   | 53  | 0   | 75  | 0   | 45 | 45 |
| 000010F_012 quiver | 29282 | 197 | 1   | 98  | 32  | 63  | 5   | 42 | 29 |
| 000018F_004 quiver | 28808 | 280 | 2   | 83  | 1   | 28  | 4   | 40 | 37 |
| 000002F_015 quiver | 28220 | 0   | 0   | 8   | 0   | 0   | 0   | 45 | 45 |
| 000005F_013 quiver | 26271 | 37  | 19  | 69  | 36  | 14  | 28  | 31 | 27 |
| 000066F_001 quiver | 25194 | 23  | 202 | 100 | 86  | 31  | 26  | 30 | 23 |
| 000189F_001 quiver | 22194 | 17  | 2   | 15  | 5   | 1   | 3   | 39 | 35 |
| 000002F_030 quiver | 22178 | 0   | 0   | 21  | 0   | 9   | 0   | 43 | 43 |
| 000143F_002 quiver | 22091 | 0   | 34  | 0   | 149 | 0   | 0   | 43 | 43 |
| 000109F_001 quiver | 21623 | 155 | 105 | 109 | 75  | 24  | 21  | 23 | 23 |
| 000031F_002 quiver | 21378 | 0   | 1   | 0   | 16  | 0   | 1   | 43 | 43 |
| 000017F_006 quiver | 20664 | 0   | 0   | 0   | 21  | 0   | 7   | 43 | 43 |
| 000046F_001 quiver | 20553 | 0   | 2   | 0   | 25  | 0   | 5   | 43 | 43 |
| 000033F_002 quiver | 20195 | 1   | 157 | 76  | 123 | 6   | 109 | 40 | 24 |
| 000039F_001 quiver | 19189 | 0   | 0   | 23  | 0   | 4   | 0   | 43 | 43 |
| 000017F_004 quiver | 18591 | 0   | 117 | 0   | 198 | 0   | 16  | 43 | 43 |
| 000001F_018 quiver | 18157 | 12  | 0   | 26  | 0   | 6   | 0   | 43 | 43 |
| 000058F_002 quiver | 16353 | 64  | 18  | 97  | 32  | 6   | 2   | 29 | 27 |
| 000002F_059 quiver | 16172 | 53  | 0   | 9   | 0   | 9   | 0   | 42 | 42 |
| 000002F_045 quiver | 14026 | 0   | 0   | 1   | 0   | 1   | 0   | 41 | 41 |
| 000028F_004 quiver | 10031 | 0   | 0   | 10  | 0   | 1   | 0   | 40 | 40 |

Supplementary Table 7. Arabidopsis AUGUSTUS CDS prediction results

| Assemblies    |                         | TAIR 10                              | Col-0           | Cvi-0           |
|---------------|-------------------------|--------------------------------------|-----------------|-----------------|
|               | Number of predicted CDS | 27,954                               | 28,176          | 27,797          |
|               |                         | 100% indel-free full length overlaps |                 |                 |
| Col-0         | 28,176                  | 26,897<br>96.2%                      |                 |                 |
| Cvi-0         | 27,797                  | 18,422<br>65.9%                      | 18,473<br>65.6% |                 |
| Col-0 x Cvi-0 | 56,806                  | 26,812<br>95.9%                      | 26,931<br>95.6% | 26,582<br>95.6% |

Supplementary Table 8. *V. vinifera* CDS alignment summary

|                               | CDS aligned to p_ctgs | CDS aligned to h_ctgs | CDS aligned to both p_ctg and h_ctg | CDS aligned to both p_ctg or h_ctg | Total CDS predicted in PN40024 |
|-------------------------------|-----------------------|-----------------------|-------------------------------------|------------------------------------|--------------------------------|
| Full and partial alignments   | 27288<br>91%          | 22447<br>75%          | 20841<br>70%                        | 28894<br>96%                       | 29971<br>100%                  |
| Full alignments with clipping | 24251<br>81%          | 19436<br>65%          | 16981<br>57%                        | 26706<br>89%                       | 29971<br>100%                  |

Supplementary Table 9. FALCON-Unzip phase concordance with short read dataset

| <b>Variant Filtering Criterion</b> | <b>total pairs</b> | <b>phase discordant pairs</b> | <b>phase discordant %</b> | <b>sum of lengths between pairs</b> |
|------------------------------------|--------------------|-------------------------------|---------------------------|-------------------------------------|
| QUAL > 10, All                     | 136348             | 782                           | 0.574%                    | 9726672                             |
| QUAL > 500, SNP only               | 109149             | 425                           | 0.389%                    | 9110210                             |
| QUAL >1000, SNP only               | 92780              | 270                           | 0.291%                    | 8062835                             |

QUAL = Freebayes variant call "Quality value"

| <b>Variant Filtering Criterion</b>                        | <b>QUAL &gt; 10, All</b> | <b>QUAL &gt; 500, SNP only</b> | <b>QUAL &gt;1000, SNP only</b> |
|-----------------------------------------------------------|--------------------------|--------------------------------|--------------------------------|
| <b>Total number of block</b>                              | 8896                     | 8662                           | 8590                           |
| <b>Total phased length</b>                                | 9647518                  | 9056219                        | 8018724                        |
| <b>phasing BLOCK N50 (bp)</b>                             | 2339                     | 2155                           | 1831                           |
| <b>Total variant phased</b>                               | 145112                   | 117732                         | 101242                         |
| <b>phased variant count N50</b>                           | 53                       | 37                             | 28                             |
| <b>Number of 100% concordant phased blocks</b>            | 8582                     | 8458                           | 8429                           |
| <b>Total concordant phased length</b>                     | 8945335                  | 8593313                        | 7677149                        |
| <b>N50 of 100% concordant phased blocks</b>               | 2174                     | 2078                           | 1764                           |
| <b>Number of variant in 100% concordant phased blocks</b> | 132279                   | 111177                         | 97359                          |
| <b>N50 of 100% concordant phased variants</b>             | 48                       | 36                             | 27                             |



Supplemental Table 10: Selected Heterozygous Genomes

| Latin Name                                              | Genome Size (Mbase) | Heterozygosity (%) | Citation and URL                                                                                                                                                                                                                                                                                                                                            |
|---------------------------------------------------------|---------------------|--------------------|-------------------------------------------------------------------------------------------------------------------------------------------------------------------------------------------------------------------------------------------------------------------------------------------------------------------------------------------------------------|
| <i>Ananas comosus</i><br>(Pineapple)                    | 526                 | 1.89%              | Ming, R, et al. "The pineapple genome and the evolution of CAM photosynthesis" <i>Nature Genetics</i> 47, 1435–1442 (2015)<br>doi:10.1038/ng.3435<br><a href="http://www.nature.com/ng/journal/v47/n12/full/ng.3435.html">http://www.nature.com/ng/journal/v47/n12/full/ng.3435.html</a>                                                                    |
| <i>Boa constrictor constrictor</i><br>(Boa Constrictor) | 1,600               | 0.36%-0.42%        | Bradnam, Keith R., et al. "Assemblathon 2: evaluating de novo methods of genome assembly in three vertebrate species." <i>GigaScience</i> 2.1 (2013): 1.<br><a href="https://gigascience.biomedcentral.com/articles/10.1186/2047-217X-2-10">https://gigascience.biomedcentral.com/articles/10.1186/2047-217X-2-10</a>                                       |
| <i>Ciona intestinalis</i><br>(Sea Squirt)               | 160                 | 1.20%              | Dehal, Paramvir, et al. "The draft genome of <i>Ciona intestinalis</i> : insights into chordate and vertebrate origins." <i>Science</i> 298.5601 (2002): 2157-2167.<br><a href="http://science.sciencemag.org/content/298/5601/2157">http://science.sciencemag.org/content/298/5601/2157</a>                                                                |
| <i>Crassostrea gigas</i><br>(Oyster)                    | 637                 | 1.30%              | Zhang, Guofan, et al. "The oyster genome reveals stress adaptation and complexity of shell formation." <i>Nature</i> 490.7418 (2012): 49-54.<br><a href="http://www.nature.com/nature/journal/v490/n7418/full/nature11413.htm">http://www.nature.com/nature/journal/v490/n7418/full/nature11413.htm</a>                                                     |
| <i>Lates calcarifer</i><br>(Asia Seabass)               | 700                 | 0.50%              | Vij, Shubha, et al. "Chromosomal-Level Assembly of the Asian Seabass Genome Using Long Sequence Reads and Multi-layered Scaffolding." <i>PLoS Genet</i> 12.4 (2016): e1005954.<br><a href="http://journals.plos.org/plosgenetics/article?id=10.1371/journal.pgen.1005954">http://journals.plos.org/plosgenetics/article?id=10.1371/journal.pgen.1005954</a> |
| <i>Melopsittacus undulatus</i><br>(Budgerigar)          | 1,200               | 0.1%-0.8%          | Bradnam, Keith R., et al. "Assemblathon 2: evaluating de novo methods of genome assembly in three vertebrate species." <i>GigaScience</i> 2.1 (2013): 1.                                                                                                                                                                                                    |

|                                                             |       |       |                                                                                                                                                                                                                                                                                                                                     |
|-------------------------------------------------------------|-------|-------|-------------------------------------------------------------------------------------------------------------------------------------------------------------------------------------------------------------------------------------------------------------------------------------------------------------------------------------|
|                                                             |       |       | <a href="https://gigascience.biomedcentral.com/articles/10.1186/2047-217X-2-10">https://gigascience.biomedcentral.com/articles/10.1186/2047-217X-2-10</a>                                                                                                                                                                           |
| <i>Olea europea</i><br>sbsp. <i>Europea</i><br>(Olive Tree) | 1,320 | 0.50% | Cruz, Fernando, et al. "Genome sequence of the olive tree, <i>Olea europaea</i> ." <i>GigaScience</i> 5.1 (2016): 1.<br><a href="https://gigascience.biomedcentral.com/articles/10.1186/s13742-016-0134-5">https://gigascience.biomedcentral.com/articles/10.1186/s13742-016-0134-5</a>                                             |
| <i>Phoenix dactylifera</i><br>(Date Palm)                   | 380   | 0.46% | Al-Dous, EK, et al. "De novo genome sequencing and comparative genomics of date palm ( <i>Phoenix dactylifera</i> )" <i>Nature Biotechnology</i> 29, 521–527 (2011) doi:10.1038/nbt.1860<br><a href="http://www.nature.com/nbt/journal/v29/n6/full/nbt.1860.html">http://www.nature.com/nbt/journal/v29/n6/full/nbt.1860.html</a>   |
| <i>Picea abies</i><br>(Norway Spruce)                       | 20000 | 0.82% | Nystedt, B, et al. "The Norway spruce genome sequence and conifer genome evolution" <i>Nature</i> 497, 579–584 (30 May 2013) doi:10.1038/nature12211<br><a href="http://www.nature.com/nature/journal/v497/n7451/full/nature12211.html">http://www.nature.com/nature/journal/v497/n7451/full/nature12211.html</a>                   |
| <i>Populus tremula</i><br>(Poplar Tree)                     | 500   | 1.30% | Wang, Jing, et al. "Natural selection and recombination rate variation shape nucleotide polymorphism across the genomes of three related <i>Populus</i> species." <i>Genetics</i> 202.3 (2016): 1185-1200.<br><a href="http://www.genetics.org/content/202/3/1185.abstract">http://www.genetics.org/content/202/3/1185.abstract</a> |
| <i>Pyrus bretschneideri</i><br>Rehd.<br>(Pear)              | 527   | 1.02% | Wu, J et al. "The genome of the pear ( <i>Pyrus bretschneideri</i> Rehd.)" <i>Genome Research</i> . 2013. 23: 396-408<br><a href="http://genome.cshlp.org/content/23/2/396.full">http://genome.cshlp.org/content/23/2/396.full</a>                                                                                                  |
| <i>Solanum tuberosum</i> L<br>(Potato)                      | 844   | 2.50% | The Potato Genome Sequencing Consortium. "Genome sequence and analysis of the tuber crop potato" <i>Nature</i> 475, 189–195 (14 July 2011) doi:10.1038/nature10158<br><a href="http://www.nature.com/nature/journal/v475/n7355/full/nature10158.html">http://www.nature.com/nature/journal/v475/n7355/full/nature10158.html</a>     |

# Phased Diploid Genome Assembly with Single Molecule Real-Time Sequencing

## Supplementary Note

### [Additional details for \*Arabidopsis\* sequencing and assembly](#)

We individually sequenced the inbred Col-0 and Cvi-0 genomes using 49 and 60 SMRT Cells with P4-C2 sequencing chemistry, generating 15.2 Gbp (~130x coverage) and 14.7 Gbp (~120x coverage) of raw sequence data, respectively. The raw data produced was commensurate with P4-C2 performance (Kim et al. 2014), with average insert read length of 6.5 kbp and 6.1 kbp, and maximum read-lengths of 44,472 bp (**Supplementary Table 1**). The two inbreds were assembled independently using FALCON and both generated ~120 Mb of assembled sequence in 377 (Col-0) and 260 (Cvi-0) contigs. (**Table 1**). The contig N50 sizes of the assemblies were 7.4 Mb (Col-0) and 6.0 Mb (Cvi-0) (**Table 1**). We used the whole genome alignment algorithm nucmer and the associated dnadif tool (MUMmer3 package(Kurtz et al. 2004)) to evaluate the accuracy by comparing our Col-0 assembly to the TAIR10 assembly. The nucleotide sequence accuracy was greater than 99.98%.

For the Col-0 x Cvi-1 F1 cross sample, we collected 18.5 Gbp sequence data (~ 140X haploid size from 29 SMRTcells, P6-C4 chemistry) and 60x short-read (paired-end 250bp) dataset. For all three samples, we collect high coverage long read datasets in order to build the best assemblies and provide the datasets for future down-sampling experiments to understand the tradeoff between assembly contiguity or accuracy and sequencing coverage. We performed a 60x down-sampling assembly for the F1 strain, FALCON results an assembly of contig N50=2.28Mb which is still much more contiguous than the assembly from similar coverage of the short read data.

### [Arabidopsis assembly gene space completeness evaluation](#)

Since Arabidopsis genome is A/T (~64%) rich, when examining the sequence alignments around the discordant sites in detail, we found that most indel discordant sites were within long homopolymers (**Supplementary Data 1: col-0\_TAIR10\_1\_l10000.snp\_with\_context.txt**) or in simple tandem duplications. There were 68,036 A or T homopolymer blocks at least 10bp long from in our diploid F1 assembly (haplotigs and primary contigs), and 34,483 such blocks in the haploid TAIR10 assembly up to 48bp long (**Supplementary Fig. 6**). While the SMRT Sequencing can processively read through very long, e.g. greater than 20bp, 100% A/T homopolymers, the exact length of the longest homopolymer regions may not be correct. We caution, however, that even Sanger sequencing of very long homopolymers is unreliable, and some of the discordance could arise from errors in the reference or reflect true polymorphisms existing between the samples.

To assess the quality of the assembly of the gene space, and the impact of the residual homopolymer indels on gene prediction, we first applied the gene prediction tool AUGUSTUS (Stanke and Waack 2003) on TAIR10, our FALCON Cvi-0 and Col-0 assemblies, and our Cvi-0 x Col-0 F1 FALCON/FALCON-Unzip assembly and compared the predicted coding sequences (CDS) (**Supplementary Table 7**). We focus on the fully aligned CDS predictions without indels as mismatches are less likely to cause frameshift errors. Complete predicted CDS from the inbred and F1 assemblies aligned completely to 95 - 96% of the 27,954 CDS of TAIR10 without indels. To avoid potential bias due to *ab initio* prediction, we performed an additional analysis by directly aligning the manually curated TAIR10 CDS to the entire assembly using the STAR aligner (Dobin et al. 2013). Overall, 96% of the 35,386 TAIR10 CDS were fully aligned without indels or truncations to the F1 assembly contigs. Another 1.04% CDS were successfully aligned allowing for only one base insertion or deletion: 0.18% CDS had a 1 base insertion and 0.86% CDS had a 1 base deletion.

### Analysis of the variations between haplotypes in *Arabidopsis* Col-0 x Cvi-0 F1 genome

With both haplotype sequences robustly assembled, we analyzed the differences between the homologous chromosomes using nucmer and Assemblytics (**Table 2**). When we compared the haplotigs to the primary contigs in the diploid F1 assembly, we identified 450,680 SNPs, compared to 501,243 found by aligning the Col-0 and Cvi-0 inbred assemblies. As expected, many of the het-SNP pairs between the comparisons were indeed identical SNPs. We identify the context (20bp + 20bp each side around the SNPs) between the het-SNP pairs between (1) the haplotigs to the primary contigs and (2) the Col-0 and Cvi-0 contigs. Out of 449,789 unique contexts of the het-SNPs between the haplotigs to the primary contigs, 422,588 (94.0 %) of them are identical to those pairs between Col-0 and Cvi-0 contigs.

Using Assemblytics, we identified 966 SV events (>50bp indels or tandem repeat contractions and expansions) between the haplotigs and primary contigs, compared to 1,051 between the Cvi-0 and Col-0 assemblies. Thus, FALCON-Unzip phased 85.7% of all SNPs and 91.9% of all SVs directly from the shotgun sequence assembly. Interestingly, 5039 of the 31,679 Augustus predicted coding regions (full transcript predictions) intersected structural variants at least 50bp in size identified on the primary contigs, which may have important effect on gene expression regulation and/or functionality.

We estimated the amount of variation affecting coding sequences by comparing the predicted CDS (**Table 2**) between the Col-0 and Cvi-0 inbred lines. We found about 184,000 (0.45%) SNPs within the 40.7Mbp predicted CDS of the inbred assemblies, compared to 148,000 (0.41%) SNPs within the 36 Mbp CDS between the haplotigs and the primary contigs in the FALCON-Unzip assembly of the F1 (**Table 2**). The number of heterozygous SNPs and SVs present in the F1 assembly is marginally lower than those from the comparison between Col-0 and Cvi-0, mostly because the collection of the haplotigs does not fully represent the full haploid chromosome set. In particular, the number of variants between the haplotigs and the primary contigs is consistent with the total haplotig size (105 Mbp) that is about 87% of the estimated genome size.

## Comparison of the long-read and short-read assemblies of the *Arabidopsis* Col-0 x Cvi-0 F1 genome

By comparing the short and long read assemblies to the TAIR10 genome, we can assess the quality differences between the assemblies and the ability to identify variants. We used Assemblytics to call insertion and deletion variants from the three *Arabidopsis* F1 assemblies with FALCON-Unzip, Platanus, and SOAPdenovo to the TAIR10 reference. We aligned the contig sequences for the short-read assemblies since aligning the scaffolds may introduce artificial variants due to sequence gaps marked with Ns. Assemblytics identified a total of 215,801 variants from the FALCON-Unzip assembly, of which 3,847 were structural variants larger than 50bp (**Supplementary Fig. 4, Supplementary Table 4**). In contrast, Assemblytics detected 85,899 variants (1,128 sites >50bp) in the Platanus assembly and only 2,414 variants (10 sites >50bp) from the SOAPdenovo assembly. The variants from the FALCON-Unzip assembly captured 89% of the Platanus variants and 90% of the SOAP variants at a stringent requirement of the exact same variant type, size, and genomic location. However, the Platanus and SOAP assemblies captured only 37% and 1% of the FALCON-Unzip variants, respectively. The contiguity of the assemblies greatly affects the numbers and sizes of variants that can be called, and since differing haplotypes can result in mis-assemblies, constructing proper haplotypes can be an important factor in accurate variant-calling from an assembly.

## BUSCO plant ortholog set selection

The BUSCO plant set is comprised of 956 putative single copy orthologs totaling 587,335 amino acid residues from a set of 30 embryophyte lineages as accessioned in OrthoDB V9.

## *Clavicornia pyxidata* gene space evaluation with BUSCO

*In lieu* of a reference, we evaluated the assemblies using BUSCO and genomic sequencing data (SRA accession: SRR1800147, 86X, 150 bp reads) (**Supplementary Table 3**). The Platanus assembly contains approximately the same number of single copy eukaryote BUSCO sets as those in the FALCON-Unzip assembly (**Supplementary Table 3**). However, the Platanus assembly missed nearly all of the homologous copies in the diploid genome (29/429 eukaryotic BUSCO proteins are duplicated compared to 277/429 in the FALCON-Unzip assembly) and the regulatory context around the genes is much more limited. The best SOAPdenovo assembly (with *k*-mer size 19) yields less than 3% single complete genes copies and had a shorter N50 than the Platanus assembly.

## The effect of different level of heterozygosity on primary contig and haplotig layout

By design, primary contigs are only locally phased within the homologous region of each haplotig but some regions in the primary contigs have no corresponding haplotig due to low

heterozygosity. FALCON-Unzip generates the primary contig to maintain the continuity through those regions, but it does not maintain the haplotype phases across them. The type and the amount heterozygosity between homologous chromosomes will affect the segregation of haplotigs from the primary contigs.

Fundamentally, to separate the haplotypes reliably, two conditions are necessary: (1) enough read coverage to call het-SNPs with random sequence error (Myers Jr 2016) and (2) enough number of het-SNPs within the read lengths. For (1), we only call het-SNPs on positions with coverage larger than 10. This minimum coverage requirement allows reducing false positives of the het-SNP calls even with the sequence or alignment errors. For (2), if the neighboring het-SNPs are too distant, we might not have reads connecting them we will not be able build haplotype relationship between those SNPs. And if a read covers less than two het-SNPs, we will not be able to assign the haplotype reliably. In such case, we will have regions that are un-phased and the regions will have no corresponding alternative haplotigs from the primary contigs. From this study and earlier studies, many genomes have heterozygosity level of het-SNP rate from 0.5% to more than 1.0% (**Supplementary Table 10**). If the overall het-SNP rate is roughly 0.5% to 1%, we should get at least 25 to 50 het-SNP sites for reads longer than 5kb. However, the het-SNP may not be evenly distributed through the genomes and it affects the performance of the haplotype segregation.

**Supplementary Fig. 8** shows the distribution of observed number of het-SNP per reads for the longest contig of each genome. If we only focus on reads of length between 9kb to 11k to avoid the confounding factor from variable read lengths, we find the number of het-SNPs per read with the specific read length range can be fitted with exponential distributions. This implies that certain regions will have many fewer het-SNPs than the genome-wide average.

With 20 to 50 het-SNPs in 10kb region, we will have enough information to reliably assign the haplotype of the reads. However, the variations between the haplotypes are subjected to evolution constraints and such variations cannot be characterized by a single average het-SNP rate. Even with high average het-SNP rate, there could be some regions with lower het-SNP rates, perhaps even zero het-SNPs, that we cannot make unambiguous haplotype assignment. For example, if we need three or more het-SNPs for reliably haplotyping the reads of 10kb, we will need the local het-SNP rate at least higher than 1 in 3kb. With a random mutation assumption, the requirement of the het-SNP rate for haplotyping can be modeled mathematically. How the performance for haplotype segregation depends on local het-SNP rates across the tree of life is certainly an important subject for future research.

In extreme cases, if there are many structural variations between the haplotypes or the sequence identity is lower than the pre-specified overlapping identity threshold, we might not even find proper overlaps between the reads from different haplotypes. When this happens, the paths corresponding to different haplotypes will not even cross each other and FALCON will layout them as separated primary contigs.

Our assemblies of the three organisms we assembled in this work reflect how such different levels of heterozygosity affect the results at qualitative level. In term of heterozygosity observed from the data, *C. pyxidata* has the lowest heterozygosity genome-wide, as about 50% of the (haploid) genome has low het-SNP density that cannot be phased (see **Supplementary Fig. 8** for an example of a low heterozygosity region identified with orthogonal data).

Next, *Arabidopsis* Col-0 x Cvi-0 F1 genome has a medium rate of heterozygosity, with an overall SNP rate of  $\sim 1/200$ bp and  $\sim 1000$  structural variations at least 50bp in size. The total haplotig size (105Mbp) is less than the haploid genome size, indicating small portion of the genome has low heterozygosity. Furthermore, the p-contig size is 140Mb that is modestly larger than haploid genome size. Using Satsuma (Grabherr et al. 2010), we find about 18.9 Mbp of separate primary contigs were actually syntenic to each other and mapped to the same region along the TAIR10 reference. This can be explained by the variations between the parental haplotypes being so extensive such that the sub-graphs of the two haplotypes are no longer associated. Thus, the total primary assembly size may be modestly larger than the haploid genome size and the total haplotig size might be smaller than the haploid genome size.

Finally, in *V. vinifera* the p-contig assembly size (590 Mb) is about 18% bigger and the haplotig size (368 Mb) is 26% smaller than the estimated genome size ( $\sim 500$  Mb). We use Satsuma to find syntenic p-contigs. We identified 25 Mbp of syntenic blocks between the p-contigs. Given the two parent strains are actually different species, it maybe possible there are some other syntenic regions that are not identified by our method as the divergence between them are high beyond the sensitivity of the tool we use.

With the default FALCON parameter setting, it requires at least 96% identity between error-corrected reads for overlapping. If the sequence identity between homologous chromosomes drops below that or there are many larger structure variations between the reads, the reads will not have any reported overlaps, and the assembler will construct separate p-contigs. While it is possible to turn the parameters to be more permissive to catch weaker homologies between haplotypes, the parameters would depend on the underlying biological sequence structure of the chromosome as well as the sequencing characteristics. We summarize how the different level heterozygosity may affect the contig layout in **Supplementary Fig. 10**. With the observation of different degrees of heterozygosity from 3 different genomes in this study, we would need to survey a broader range of organisms to understand the nature of the diploid and polyploidy heterozygosity across the different kingdoms of life.

### Updated FALCON consensus algorithm

FALCON's consensus module (FALCON-sense) takes a set of seeding sequences and their supporting reads to generate consensus for each of the seeding sequences. Here is the updated consensus process:

1. For each seed sequence, the supporting reads are aligned to the seed sequences with a variation of Gene Myers' O(ND) aligner (Myers 1986). We don't allow for mis-matches in

the alignments. All differences are encoded as insertions and deletions.

2. For each position in an alignment between a supporting read and its seed read, we generate an "alignment tag" specific to the position and the supporting read. The tag consists of 4 fields: (1) the anchoring position in the seed sequence, (2) the "delta" from the anchoring position on the seed sequence, (3) the base of the seed sequence and (4) the base of the supporting read in the alignment. When there are insertions in the supporting reads at a given position, the inserted base in the alignment has a non-zero "delta" value indicating the number of base from the anchoring bases. Note that field (3) and (1) contain the same information encoded differently. We keep field (3) just for convenience.
3. We create the alignment graph from all alignment tags of all supporting reads. The alignment graph is created as following:
  1. For each distinct tag, we create a corresponding node in the graph.
  2. For consecutive tags from a supporting read, we create an edge in graph and assign a variable "edge\_count" associated with the edge to be 1. If the edge already exists, we simply increase the "edge\_count" by 1. The result is a directed acyclic graph where each node has a tag, and the "edge\_count" indicates how many reads supporting the connection between the two nodes. A higher number for "edge\_count" of an edge indicates higher confidence about the "connection" between the nodes from the supporting reads. A high quality consensus sequence is simply a chain of nodes connected by those high confidence edges.
4. A standard dynamic programming algorithm is applied on the alignment graph to find the highest confidence path. We generate the consensus sequence by concatenating the bases of the tags through the best path.

**Supplementary Fig. 12** summarizes the process. In the highlighted box of the path, we see one insertion error corrected and two missing bases recovered.

Two paths are highlighted in the graph with dashed curves. The cyan dashed curve indicates the path of the seed sequence. The green dashed curve indicates the final consensus path. Node "0092:0:T:T" is identified as an erroneous extra base in the seed read. The new nodes, "0091:0:-:C" and "0091:0:-:A" are added to the consensus path. The green arrows highlight the path of the original template sequence. The "CA" insertion to the seed sequence concurs with the original template sequence. Namely, the consensus indeed corrects 3 simulated errors in the seed read for this case.

[Assembly string graph reduction process summary](#)



## Constructing the initial string graph

After the reads are error-corrected, “daligner” was used to obtain the overlaps between the reads. An overlap-filtering step is applied to remove contained reads or reads that appear to be from high copy repetitive regions. We adapt the method described in Myers’ paper (Myers 2005) to build the string graph from the filtered overlap pairs of reads. There are some differences in our implementation of the string graph from the original paper. Instead of using the bi-directed edge graph described in the paper, we construct an ordinary directed graph from the overlaps. Each pair of overlap actually creates two directed edges. However, we only trace the graph along one direction to represent both contigs and their reverse complement counterpart. Namely, for each pair of edges, only one of the two edges will be in the final contigs. We explicitly track such duality of the edge-pairs to remove redundant reverse complement edges during the layout stage.

## A heuristic algorithm for constructing compound paths

Here we describe some heuristic algorithms used to identify “bubbles” in the initial assembly string graph. Conceptually, a "bubble" refers to a sub-graph that (1) has only one source node and one sink node, (2) has multiple paths from the source to the sink and (3) remains weakly connected after any single edge removal. Complicated heterozygous structural variation or repetitive regions between two haplotypes in a diploid dataset may result in more complicated structures:

(1) For example, it is possible to have nested bubbles:

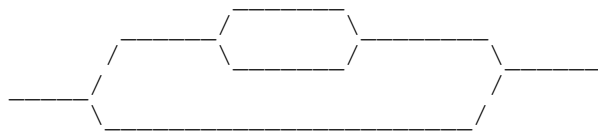

(2) Or, there can be loops in such graph

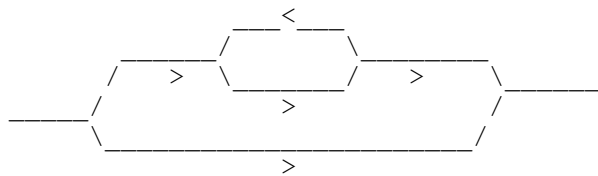

(3) We also encounter some very tangled nested bubbles, which might indicate some local complicated repeats that are hard to resolve:

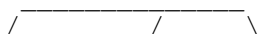

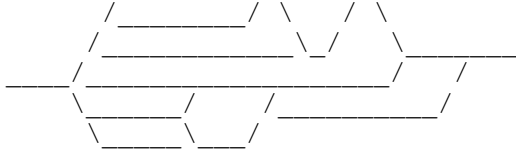

We adopt a pragmatic approach to solve the problem of finding such local structures. A sketch of the heuristic used by Falcon to find the “compound path” of “bubbles” is presented here:

- 1) Simplify the initial assembly string graph to a graph with simple paths. Namely, all edges in a path with out any branching node become single edge. We call this graph  $UG_0$ .
- 2) For each node with multiple out-edges in  $UG_0$ , we start a search to find a local "bundle" of edges. We set up "active tracers" to trace down each branch from the source node.
  - a) In each iteration step, we check each single node that has an active tracer. If every in-node of a node already has a tracer, we add active tracers to its offspring nodes and the tracer of the parent node becomes inactive. If there is only one active tracer left, the subgraph of all traced nodes and the edges between them is considered a "compound path".
  - b) We detect a loop by checking if any of the offspring of a node with an active tracer already have an occupied tracer. When a loop is detected, the search stops and we don't generate a compound path.
  - c) In some complicated repetitive parts of the genome, the number of active tracers can increase quickly. We limit the number of active tracers in order to avoid excessive computation unnecessarily. If the number of active tracers is beyond a pre-specified limit (3 tracers in the current implementation), we stop the search.
  - d) For each step, we can calculate the number of nodes and the length of the path as longest number of sequence bases from the source to all nodes with an active tracer. If those numbers of nodes or the longest path length is bigger than pre-specified numbers, the search stops.
- 3) Some of the "compound paths" are overlapped with others or one contains the other, e.g., the smaller bubble is part of the big bubble in the case of nested bubbles. In such case we choose the big one and ignore the small one.

Each "compound path" is a set of the simple paths in  $UG_0$ . The simple paths in  $UG_0$  are then replaced by the newly identified “compound path” resulting in a unitig graph where each edge is either a simple path or a compound path. The next step is to identify the un-branched paths in the unitig graph and generate the contigs by concatenating the sequences along the edges as shown in **Supplementary Fig. 14**.

[From sequence overlaps to primary and associated contigs](#)

**Supplementary Fig. 14** summarizes the whole process from the corrected reads to primary and associated contigs through multiple stages of graph simplification. Basically, we decompose the string graph into compound and simple paths. A primary contig can be constructed by finding

the path of a non-branching collection of compound and simple paths. For each compound path, we can generate the associated contigs that typically have a large number of variations relative to the primary contigs. The primary contigs are still haplotype-fused contigs. Namely, different parts of the primary contigs might come from different haplotypes. The layout rules provide no guarantee to keep the haplotype consistent through the primary contig at this stage. Further, when there is little variation between two haplotypes, there will be no associated contigs generated. We can further use the “FALCON-Unzip” code to separate the haplotype sequences and generate haplotype coherent contigs (haplotigs).

### A greedy SNPs phasing algorithm

To reconstruct the haplotype sequences, we need to separate the reads that are homologous to each other but belong to different haplotypes into different groups. In FALCON-Unzip, this is done with the following steps:

- 1) Track PacBio reads to each primary contig and generate alignments between the reads and the contigs. There are two strategies: (1) examining the overlapping data generated during the assembly process to identify reads that belong to each specific contig and re-aligning reads only to each specific contig or (2) simply aligning the reads back to all assembled contigs. For (1), initially, we examine the tiling path of each of the contigs. The reads corresponding to the tiling path are assigned to the contig. After that we examine the overlapping data generated from the assembly process. Each read may overlap with other contig-assigned reads or other un-assigned reads in the original overlap data. The overlapped contig-assigned reads may not be from the same contig. We need to score the overlaps and decide the best contig assignment of the query. We score each pair overlap by the overlap length. If the best pair overlap read already has been assigned to a contig, the unassigned query read will be assigned to the same contig. The reads are grouped into sets that are associated with each primary contig. Each contig and its associated reads are aligned independently. In contrast to strategy (2), where the alignments are done globally, method (1) is much more computationally efficient as it re-uses overlap data that already exists.
- 2) Call het-SNPs for each contig. As most haplotype reconstruction algorithms (Halldórsson et al. 2004; Bansal and Bafna 2008), we need a set of het-SNP calls as input. We use a simple alignment and counting method for calling het-SNPs. We align the reads to the draft contigs with BLASR (Chaisson and Tesler 2012) and generate SAM/BAM alignment files. We only focus on SNP calls and we also ignore SNP calls that have insertions or deletions nearby. Namely, we only count variations within the “M” block of the CIGAR string in the BAM files (<https://samtools.github.io/hts-specs/SAMv1.pdf>). For each base in the contig, we count the number each “A”, “C”, “G”, and “T” bases from the aligned reads. If the highest count is less than 75% and the second count is higher than 25%, we call a het-SNP site and the top two bases are used as the two allele bases for further SNP phasing downstream.
- 3) Phase het-SNPs for each contig. We use a simple greedy algorithm to phase the SNPs into different haplotype groups. The general method is shown in the **Supplementary Fig. 15**. For

each het-SNP site, the initial phase of the variants are randomly chosen. For any two sites that have shared reads mapped on, we can calculate a “coupling score”. The “coupling score” is defined simply as the number of reads supporting the particular phase. Along the reference, we scan the het-SNP sites from the 5'-end to 3'-end. We test the two possible choices of the phase at the given site for each het-SNP site. The choice with more “coupling score” support is kept. When there are fewer than 6 reads connecting two het-SNP sites, we break the haplotype blocks. We apply this scanning and updating process iteratively until no more optimization of the score is possible or reach a pre-specified limit of iterations. At the end of this process, the het-SNP sites along the reference will be grouped into different haplotype blocks and we have a set of phased SNPs associated with each block.

- 4) Assign phases to the raw reads. For each read, we examine the alignment to the reference. If the read contain het-SNP calls against the reference, we count which phases it agrees the most and assign a tuple of “(block identifier, phase identifier)” to the read. For reads where no haplotype block and phase assignment is possible, e.g. reads without enough het-SNP calls, we simply assign a sentinel value for the block identifier to trace the un-phased reads.

The phasing method presented here is rather generic. It performs reasonably as shown in the evaluation work presented in the main manuscript. We anticipate if we integrate more sophisticate algorithms for phasing can further increase the accuracy and phasing contiguity.

#### [Incorporate phased reads to haplotype-fused string graph for unzipping collapsed paths](#)

**Supplementary Fig. 13(a)** shows the schematic of how to merge the haplotype specific assembly graph  $H_c$  to the initial haplotype-fused graph  $G_c^{(f)}$  and reconstruct the haplotype tiling paths for generating the haplotigs. The haplotype specific assembly graph has 4 disconnected subgraphs inside the cyan boxes, two for each haplotype. If we add the edges and nodes from the  $H_c$  to the haplotype-fused graph in the yellow box, we get the intermediate graph shown in the upper right panle. In the graph, the red nodes and blue nodes indicate the reads from the two different haplotypes. There are some edges connecting the nodes from two different haplotypes. Once the haplotype of the reads are known, we can remove those edges. This results in the graph in lower panel. We can construct the tiling paths for the two haplotigs from the two disconnected and haplotype specific components.

**Supplementary Fig. 13(b)** shows an example constructing the primary contig and haplotigs from the *Clavicornona pyxidata* assembly. Along the initial primary contig, we can find 4 haplotype blocks and an un-phased region. By applying the FALCON-Unzip process, we bring back some reads to fully reconstruct the haplotigs. In this example, the four initial haplotype block can be further merged by the overlaps across the bubbles in the assembly graph.

#### [Augmented alignments for haplotype specific quiver consensus](#)

Once we construct the final primary contigs and the associated haplotigs, each of them may contain one or more known haplotype blocks and specific phase of each block. Each read also has a tuple “(block identifier, phase identifier)”. The tuple label is used to separate the read into different groups and aligned to the specific primary contigs or haplotigs specifically for generating the final consensus with Quiver. Since each set of the alignments on each haplotigs or primary contigs is already specific to the correspond haplotypes, we can apply the Quiver consensus algorithm that is designed for single haplotype to get accurate consensus sequences. In the future, we can design an aligner taking the extra information of the reads and the references to do haplotype match alignment without manually separating reads into different files and aligning separately.

## Analysis parameters and commands for the analysis

### Daligner and FALCON parameter choices for error correction

Here are the algorithm-related assembly parameters used for the *in silico* FALCON F1 *Arabidopsis* assembly:

```
length_cutoff = 4000
length_cutoff_pr = 4000
pa_HPCdaligner_option = -v -dal128 -e0.75 -M24 -l1800 -k18 -h240 -w8 -s100
ovlp_HPCdaligner_option = -v -dal128 -M24 -k24 -h750 -e.96 -l1500 -s100
pa_DBsplit_option = -a -x500 -s400
ovlp_DBsplit_option = -s400
falcon_sense_option = --output_multi --output_dformat --min_idt 0.70 --min_cov 4 --
max_n_read 400 --n_core 8
falcon_sense_skip_contained = False
overlap_filtering_setting = --max_diff 80 --max_cov 120 --min_cov 4 --n_core 1
```

In the parameters passed to “daligner” for error correction, we use “-l1800 -k18 -h240” to reduce the number of local alignments reported by daligner to increase computational efficiency.

Here are the algorithm related assembly parameters for the *V. vinifera* Assembly:

```
length_cutoff = 5000
length_cutoff_pr = 5000

pa_HPCdaligner_option = -v -dal128 -e0.75 -M24 -l2500 -k18 -h1250 -w8 -s100
```

```
ovlp_HPCdaligner_option = -v -dal128 -M24 -k24 -h1250 -e.96 -l1500 -s100
pa_DBsplit_option = -a -x500 -s200
ovlp_DBsplit_option = -s200
falcon_sense_option = --output_multi --output_dformat --min_idt 0.70 --min_cov 4 --
max_n_read 400 --n_core 8
falcon_sense_skip_contained = False
overlap_filtering_setting = --max_diff 120 --max_cov 120 --min_cov 4 --n_core 12
```

Here are the algorithm related assembly parameters for the *Clavicornora pyxidata* Assembly:

```
length_cutoff = 7500
length_cutoff_pr = 7500
pa_HPCdaligner_option = -v -dal128 -t16 -e0.75 -M24 -l3200 -k18 -h480 -w8 -s100
ovlp_HPCdaligner_option = -v -dal128 -M24 -k24 -h1024 -e.96 -l2500 -s100
pa_DBsplit_option = -a -x500 -s200
ovlp_DBsplit_option = -s200
falcon_sense_option = --output_multi --output_dformat --min_idt 0.70 --min_cov 4 --
max_n_read 200 --n_core 8
falcon_sense_skip_contained = False
overlap_filtering_setting = --max_diff 120 --max_cov 120 --min_cov 2 --n_core 12
```

In the parameters passed to “daligner” for error correction, we use “-l3200 -k18 -h480” to reduce the number of local alignment reported by daligner to increase computational efficiency.

## Canu assemblies

Canu (<https://github.com/marbl/canu>), a fork of Celera Assembler designed specifically for noisy single molecule data was used to generate assemblies for the *Arabidopsis* Col-0 x Cvi-0 F1 cross, *Vitis vinifera* cv. Cabernet Sauvignon as well as *Clavicornora pyxidata*. Refer to the Canu documentation for details about the assembly method. In brief there are 3 steps that occur in the Canu pipeline:

- 1) Read correction. The MHAP algorithm (Berlin et al. 2015) is used to detect overlaps in the raw noisy subreads which are subsequently corrected using the overlapping data.
- 2) Read trimming. Overlap data is used to identify and remove low quality regions from the previously corrected consensus sequences.

- 3) Unitig construction. Celera Assembler is used to generate consensus Unitig sequences from the corrected high quality sequencing data.

An error rate of 0.025 coupled with the estimated haploid genome sizes of 120 Mb, 475 Mb and 44 Mb were the parameters used to assemble *Arabidopsis*, *Vitis vinifera* cv. Cabernet Sauvignon and *Clavicornia pyxidata*. This equates to roughly ~165X, 158X and 88X starting input coverage for the three species respectively.

### Short-read assemblies

The illumina reads were error corrected using Lighter(Song et al. 2014) (version 1.0.7). To obtain the best achievable results we used once the raw and once the error corrected reads for the assembly with SOAPdenovo(Li et al. 2010) (version 2.04) and Platanus(Kajitani et al. 2014) (version 1.2.4). SOAPdenovo was run with the “all” option and a range of kmer sizes “-K from 19 to 127 in order to obtain the best results. Platanus was executed with the default parameters since it internally evaluates several values of k.

The resulting contigs and scaffolds were compared to the existing reference genomes or in the case of the *Clavicornia pyxidata* to the existing PacBio based de novo assembly using an in house script to compute the N50 and NG50.

Overall both short-read assemblers run successfully on our data. However, in only one case did we not obtain a successful run from Platanus, and that was with the *V. vinifera* cv. Cabernet Sauvignon genome. We identified that the coverage (here 45x) must be the problem since recently a successful de novo assembly of this *V. vinifera* cv. Cabernet Sauvignon was reported(Patel et al. 2015) using over 1,577 million reads in three different insert size libraries.

**Supplementary Fig. 5** shows the different results for SOAPDeNovo using different kmer sizes as parameters and their impact on N50 and NG50. In our case we selected those assemblies having the largest N50 or NG50 for comparison to FALCON-Unzip.

### BUSCO command line options

A pre-release set of plant orthologs obtained from BUSCO authors is used for evaluations. The BUSCO outputs are generated by the following command:

```
python3 BUSCO_plants.py -in <asm>.fasta -o <output dir name> -l
./plant_early_release/
```

The `./plant\_early\_release/` directory contains the plant ortholog set. AUGUSTUS v.3.0.3 is used along with the BUSCO script for *de novo* gene prediction.

## CDS predictions and comparisons

We use AUGUSTUS 3.2.1 for predicting transcripts and CDS in *de novo* mode (with `--species=arabidopsis` option, but no RNA seq or transcript data provided.) The GFF files contain the predictions are generated by:

```
augustus --species=arabidopsis --codingseq=on <assembly>.fasta >
<assembly>.gff
```

Coding sequences are extracted with the `getAnnoFasta.pl` script, e.g.,

```
perl ../../augustus-3.2.1/scripts/getAnnoFasta.pl cns_ph_ctg_gene.gff
```

The predicted coding sequences between different assemblies are aligned against each other with BLASR to generate SAM files. The CIGAR string in the SAM is scanned to filter out any entry that has insertion, deletion, hard clipping and soft clipping tags for identifying full alignments (mismatch allowed). Here is an example comparing the predicted coding sequences from TAIR10 to those of the primary contigs:

```
blasr TAIR10_all.codingseq.fa cns_p_ctg_gene.codingseq.fa -noSplitSubreads -
bestn 1 -m 4 -nproc 48 -maxLCPLength 15 -nCandidates 24 -sam -out TAIR10_cns_p.sam

cat TAIR10_cns_p.sam TAIR10_cns_h.sam | awk '$0 !~/@/ && $6 !~ /[ISHD]/ && $6
!= "*" {print $1}' | sort -u | wc
```

## Synteny analysis of *Arabidopsis* and Cabernet Sauvignon

In order to identify syntenic regions between primary contigs in both the Arabidopsis F1 and the cabernet assemblies, Satsuma(Grabherr et al. 2010), an alignment algorithm that identifies sequence matches through cross-correlation and fast Fourier transform was applied. In separate analyses, primary contigs from each genome were used as targets while all other contigs were subsequently checked for syntenic relationships.

The command to generate the alignments was:

```
SatsumaSynteny -self 1 -q <query>.fasta -t <target>.fasta -o <output_dir> -ni 12 -n 24
```

The matches for each contig are collected in a satsuma\_summary.chained.out file and subsequently concatenated with other target contig matches. Reciprocal (redundant) hits were removed from the table which is available as **Supplementary Data 2-3** (synteny\_arabF1\_160425.csv, synteny\_cabernet\_160421.csv). To find the total



quantity of syntenic bases, tend – tstart was summed across all matches to yield roughly ~18.9Mb for Arabidopsis and ~25.3 Mb for Cabernet.

### BWA alignment for Illumina short reads to PacBio *Clavicornia pyxidata* assembly

We used the following command line options for BWA (v.0.7.12, <http://sourceforge.net/projects/bio-bwa/files/bwa-0.7.12.tar.bz2/download>) alignment of Illumina short reads to PacBio *Clavicornia pyxidata* assembly contigs:

#### (1) Aligning the short reads to all contigs:

```
bwa mem -M -t 48 all_quivered_ctg_cns.fasta SRR1800147_1.fastq SRR1800147_2.fastq |  
samtools view -@ 24 -1 -b -S - | samtools sort -@ 8 -m 8G - ilmn_to_all_aln_sorted
```

#### (2) Aligning the short reads to primary contigs:

```
bwa mem -M -t 48 all_p_cns.fasta SRR1800147_1.fastq SRR1800147_2.fastq | samtools  
view -@ 24 -1 -b -S - | samtools sort -@ 8 -m 8G - ilmn_to_pcns_aln_sorted
```

Note that there are many regions larger than 500bp regions between the haplotigs and their primary contigs that are 100% identical if there are no het-SNPs in those regions. `bwa mem` will not be able to uniquely map some reads as those homologous regions are in both primary contigs and the associated contigs. `bwa mem` will assign low map QV of the aligned reads in the homologous regions.

#### (3) Align RNA-seq reads to the assembly

```
mkdir -p ./cns_p_ctg; STAR --genomeFastaFiles ../../4-  
quiver_keep/cns_output/cns_p_ctg.fasta --genomeDir cns_p_ctg --runMode  
genomeGenerate
```

```
STAR --genomeDir cns_p_ctg/ --runThreadN 48 --readFilesIn SRR1589642_1.fastq  
SRR1589642_2.fastq --outSAMtype BAM SortedByCoordinate --alignIntronMax 5000 --  
outReadsUnmapped Fastx
```

#### (4) Align CDS annotation (Clapy2\_GeneCatalog\_CDS\_20150910.fasta) to the contig:

```
STARlong --genomeDir ../RNA_aln/cns_p_ctg/ --runThreadN 48 --outFilterMismatchNmax  
100 --seedSearchLmax 30 --seedSearchStartLmax 30 --seedPerReadNmax 100000 --  
seedPerWindowNmax 100 --alignTranscriptsPerReadNmax 100000 --  
alignTranscriptsPerWindowNmax 10000 --readFilesIn  
Clapy2_GeneCatalog_CDS_20150910.fasta --outSAMtype BAM SortedByCoordinate
```

## Genome-wide Alignment for Col-0 and Cvi-0 to TAIR10 comparison and Assemblytics analysis

The “delta” files are generated using the following MUMmer3 commands for Assemblytics analysis and a list of variations at SNP level is generated by `show-snps` command:

```
nucmer -maxmatch -l 100 -c 1000 asm.fa TAIR10_all.fa -p asm
delta-filter -l 10000 -1 asm.delta > asm_l10000.delta
show-snps -C -x 20 -H -T -l -q asm_l10000.delta > asm_l10000.delta.snps
```

For **Fig. 2**, the map between the assembly contigs to TAIR10 is generated by first identifying maximal exact matches between the genomes. For computational efficiency, we used a re-implementation of the Mummer algorithm (<https://github.com/godotgildor/sparseMEM-big>). The generated max-exact-matches are clustered using “mgaps” from the Mummer3 package. The chains clustered are parsed and the range of the contig mapped to TAIR10 is output as bed files and used for plotting **Fig. 2**. A similar procedure for aligning contigs to a reference and performing draft calls for large genome structural variations is documented (<https://github.com/PacificBiosciences/FALCON/wiki/Some-Tricks-Using-Falcon-To-Detect-Structure-Variations>). We only use this process to anchor the contigs to the reference. The SV calls in paper are generated by the Assemblytics using the standard MUMmer/nucmer alignments.

### Assembly example in the cloud

We generated an Amazon AWS EBS volume that has the data and the configuration for generating the *Clavicornia pyxidata* assembly results end-to-end with a local single node configuration. The step-by-step instruction to execute FALCON and FALCON-Unzip with AWS EC2 is in the **Supplementary Data 4** (AWS\_FALCON-Unzip\_Example.pdf). For large genomes, a HPC cluster environment with Sun Grid Engine is currently supported by FALCON and FALCON-Unzip and special optimization for local cluster environment to optimize CPU and I/O throughput will be necessary in general. For example, see recent FALCON assembly for gorilla genome (Gordon et al. 2016).

### Software revision used for this work

FALCON-Integrate:

URL: <https://github.com/PacificBiosciences/FALCON.git>  
Git Revision: ffbc609057741896dbe9d09f65bc5c8ef8d57f5a  
Git Tag: [https://github.com/PacificBiosciences/FALCON-integrate/tree/funzip\\_052016](https://github.com/PacificBiosciences/FALCON-integrate/tree/funzip_052016)

FALCON:

URL: [git://github.com/PacificBiosciences/FALCON.git](https://github.com/PacificBiosciences/FALCON.git)  
Git Revision: a1dd4d45bbe0144842cabdd378c46278744231f7  
Git Tag:  
[https://github.com/PacificBiosciences/FALCON/tree/funzip\\_052016](https://github.com/PacificBiosciences/FALCON/tree/funzip_052016)

Daligner:

URL: [git://github.com/PacificBiosciences/DALIGNER.git](https://github.com/PacificBiosciences/DALIGNER.git)

Git Revision: 029bfa8a40b456bad5499f6e456e6a215bfd307c

DAZZ\_DB:

URL: [git://github.com/PacificBiosciences/DAZZ\\_DB.git](https://github.com/PacificBiosciences/DAZZ_DB.git)

Git Revision: ed0b85e6f14dc394fbabd0731187f98e08a79a0a

pypeFLOW:

URL: [git://github.com/PacificBiosciences/pypeFLOW.git](https://github.com/PacificBiosciences/pypeFLOW.git)

Git Revision: e880e2b3cebe7ae19f3101a497a0a8cc6685588e

FALCON-Unzip:

URL: [https://github.com/PacificBiosciences/FALCON\\_unzip](https://github.com/PacificBiosciences/FALCON_unzip)

Git Revision: 21b1df3491e3bb7b9d8ecd13fc0c9c1a45b6393f

Git Tag:

[https://github.com/PacificBiosciences/FALCON\\_unzip/tree/funzip\\_052016](https://github.com/PacificBiosciences/FALCON_unzip/tree/funzip_052016)

Canu: <https://github.com/marbl/canu>

Revision: Canu v1.0 r7237

Git Tag:

<https://github.com/marbl/canu/commits/f00ca16e9d83a225e8f94c42cc52900456a4a6b0>

Lighter: version 1.0.7

SOAPdenovo: version 2.0.4

Platanus: version 1.2.4

## References

Bansal V, Bafna V. 2008. HapCUT: an efficient and accurate algorithm for the haplotype assembly problem. *Bioinformatics* **24**: i153-159.

Berlin K, Koren S, Chin C-S, Drake JP, Landolin JM, Phillippy AM. 2015. Assembling large genomes with single-molecule sequencing and locality-sensitive hashing. *Nature biotechnology*.

Chaisson MJ, Tesler G. 2012. Mapping single molecule sequencing reads using basic local alignment with successive refinement (BLASR): application and theory. *BMC bioinformatics* **13**: 238.

Dobin A, Davis CA, Schlesinger F, Drenkow J, Zaleski C, Jha S, Batut P, Chaisson M, Gingeras TR. 2013. STAR: ultrafast universal RNA-seq aligner. *Bioinformatics* **29**: 15-21.

- Gordon D, Huddleston J, Chaisson MJ, Hill CM, Kronenberg ZN, Munson KM, Malig M, Raja A, Fiddes I, Hillier LW. 2016. Long-read sequence assembly of the gorilla genome. *Science* **352**: aae0344.
- Grabherr MG, Russell P, Meyer M, Mauceli E, Alföldi J, Di Palma F, Lindblad-Toh K. 2010. Genome-wide synteny through highly sensitive sequence alignment: Satsuma. *Bioinformatics* **26**: 1145-1151.
- Halldórsson BV, Bafna V, Edwards N, Lippert R, Yooseph S, Istrail S. 2004. A Survey of Computational Methods for Determining Haplotypes. In *COMPUTATIONAL METHODS FOR SNPS AND HAPLOTYPE INFERENCE*, (ed. S Istrail, et al.), pp. 26--47. Springer.
- Kajitani R, Toshimoto K, Noguchi H, Toyoda A, Ogura Y, Okuno M, Yabana M, Harada M, Nagayasu E, Maruyama H et al. 2014. Efficient de novo assembly of highly heterozygous genomes from whole-genome shotgun short reads. *Genome Res* **24**: 1384-1395.
- Kim KE, Peluso P, Babayan P, Yeadon PJ, Yu C, Fisher WW, Chin C-S, Rapicavoli NA, Rank DR, Li J. 2014. Long-read, whole-genome shotgun sequence data for five model organisms. *Scientific data* **1**.
- Kurtz S, Phillippy A, Delcher AL, Smoot M, Shumway M, Antonescu C, Salzberg SL. 2004. Versatile and open software for comparing large genomes. *Genome biology* **5**: R12.
- Li R, Zhu H, Ruan J, Qian W, Fang X, Shi Z, Li Y, Li S, Shan G, Kristiansen K. 2010. De novo assembly of human genomes with massively parallel short read sequencing. *Genome research* **20**: 265-272.
- Myers EW. 1986. An O (ND) difference algorithm and its variations. *Algorithmica* **1**: 251-266.
- Myers EW. 2005. The fragment assembly string graph. *Bioinformatics* **21**: ii79-ii85.
- Myers Jr EW. 2016. A history of DNA sequence assembly. *it-Information Technology* **58**: 126-132.
- Patel S, Swaminathan P, Fennell A, Zeng E. 2015. De novo genome assembly tool comparison for highly heterozygous species *Vitis vinifera* cv. Sultanina. In *Bioinformatics and Biomedicine (BIBM), 2015 IEEE International Conference on*, pp. 1771-1773. IEEE.
- Song L, Florea L, Langmead B. 2014. Lighter: fast and memory-efficient sequencing error correction without counting. *Genome Biol* **15**: 509.
- Stanke M, Waack S. 2003. Gene prediction with a hidden Markov model and a new intron submodel. *Bioinformatics* **19**: ii215-ii225.
